# Swinging lever mechanism of myosin directly demonstrated by time-resolved cryoEM

David P. Klebl<sup>1,2†</sup>, Sean N. McMillan<sup>2,3,4†</sup>, Cristina Risi<sup>5</sup>, Eva Forgacs<sup>5</sup>, Betty Virok<sup>5</sup>, Jennifer L. Atherton<sup>5</sup>, Michele Stofella<sup>2,4</sup>, Donald A. Winkelmann<sup>6</sup>, Frank Sobott<sup>2,4</sup>, Vitold E. Galkin<sup>5</sup>, Peter J. Knight<sup>2,4</sup>, Stephen P. Muench<sup>1,2\*</sup>, Charlotte A. Scarff<sup>2,3\*</sup>, and Howard D. White<sup>5\*</sup>

<sup>1</sup>School of Biomedical Sciences, Faculty of Biological Sciences, University of Leeds, Leeds, UK

<sup>2</sup>Astbury Centre for Structural Molecular Biology, University of Leeds, Leeds, UK;

<sup>3</sup>Discovery and Translational Science Department, Leeds Institute of Cardiovascular and Metabolic Medicine, School of Medicine, Faculty of Medicine and Health, University of Leeds, Leeds, UK;

<sup>4</sup>School of Molecular and Cellular Biology, Faculty of Biological Sciences, University of Leeds, Leeds, UK;

<sup>5</sup>Department of Physiological Sciences, Eastern Virginia Medical School, Norfolk, Virginia, USA;

<sup>6</sup>Department of Pathology & Laboratory Medicine, Robert Wood Johnson Medical School, Rutgers University, Piscataway, USA.

†These authors contributed equally.

\*Corresponding authors: [c.a.scarff@leeds.ac.uk](mailto:c.a.scarff@leeds.ac.uk), [s.p.muench@leeds.ac.uk](mailto:s.p.muench@leeds.ac.uk) & [whitehd@evms.edu](mailto:whitehd@evms.edu)

## Abstract

Myosins are essential for producing force and movement in cells through their interactions with F-actin. Generation of movement is proposed to occur through structural changes within the myosin motor domain, fuelled by ATP hydrolysis, that are amplified by a lever swing<sup>1</sup>, transitioning myosin from a primed (pre-powerstroke) state to a post-powerstroke state. However, the initial, primed actomyosin state, proposed to form prior to lever swing, has never been observed. Nor has the mechanism by which actin catalyses myosin ATPase activity been resolved. To address this, we performed time-resolved cryoEM of a myosin-5 mutant having slow hydrolysis product release. Primed actomyosin was captured 10 ms after mixing primed myosin with F-actin, whereas post-powerstroke actomyosin predominated at 120 ms, with no abundant intermediate

39 structures. The structures were solved to 4.4Å and 4.2Å global resolution  
40 respectively. The primed motor binds to actin through its lower 50 kDa  
41 subdomain, with the actin-binding cleft open and Pi release prohibited. N-terminal  
42 actin interactions with myosin promote rotation of the upper 50 kDa subdomain,  
43 which closes the actin-binding cleft, and enables Pi release. Formation of upper  
44 50 kDa subdomain interactions with actin creates the strong-binding interface  
45 required for effective force production. The myosin-5 lever swings through an  
46 angle of 93°, predominantly along the actin axis, with little twisting, to produce the  
47 post-powerstroke state. The magnitude of the lever swing matches the typical  
48 step length of myosin-5 walking along actin. These time-resolved structures  
49 directly demonstrate the swinging lever mechanism, ending decades of  
50 conjecture on how myosin produces force and movement.

51

## 52 **Main text**

53 Myosins are molecular motors that move or move along filamentous actin (F-  
54 actin). They perform many functions in eukaryotes, ranging from muscle  
55 contraction to organelle transport, with mutations linked to a range of diseases  
56 including heart disease, deafness and cancer<sup>2</sup>. Myosins comprise a motor  
57 domain, which can be divided into 4 subdomains (N-terminal, upper 50 kDa  
58 (U50), lower 50 kDa (L50) and converter), a light-chain binding domain and a tail  
59 region. The converter and light-chain binding domain form the lever, that rectifies  
60 and amplifies changes within the motor domain<sup>3</sup>.

61 ATP hydrolysis by myosin provides the energy for doing work. In the nucleotide-  
62 free state, the myosin motor is strongly bound to F-actin<sup>4,5</sup>. ATP-binding opens a  
63 cleft between the U50 and L50 domains, reducing the affinity of myosin for F-  
64 actin, which dissociates the complex<sup>6</sup>. Once detached, myosin undergoes the  
65 recovery stroke, in which the myosin lever becomes primed to generate force,  
66 followed by ATP hydrolysis to ADP and phosphate (Pi)<sup>7</sup>. Release of the Pi from  
67 myosin is slow, precedes release of ADP, and thus limits the rate of energy  
68 release in the absence of interactions with actin. Primed myosin, with ADP and  
69 Pi bound, rebinds F-actin leading to Pi-release, cleft closure and generation of  
70 movement, proposedly through swinging of the lever (powerstroke)<sup>8,9</sup>, towards  
71 the barbed-end of F-actin (+actin)<sup>9</sup> for the majority of myosins. Actin accelerates  
72 Pi release ~1000-fold. The order in which Pi-release, cleft closure and  
73 powerstroke occur is debated<sup>10,11</sup>. Release of ADP from the complex is, in some

74 myosins, coupled to a second, smaller swing of the lever that completes the  
75 structural cycle<sup>12,13</sup>.

76 The mechanisms of force generation and actin activation of ATPase activity  
77 remain controversial, in part due to a lack of structural information on how myosin  
78 initially interacts with actin in its primed state<sup>3,14</sup>. Actomyosin structures in the  
79 ADP and nucleotide-free states, obtained by cryo electron microscopy (cryoEM),  
80 reveal the architecture of strongly-bound actomyosin complexes in which both  
81 the U50 and L50 subdomains interact with actin, the cleft is closed, and the lever  
82 adopts a post-powerstroke (postPS) position<sup>15</sup>. The structure of the myosin motor  
83 in the primed state in the absence of actin, with ADP-P<sub>i</sub> or analogues in the  
84 nucleotide binding site, has been solved by X-ray crystallography for multiple  
85 myosin classes including myosin-2<sup>16</sup>, -5<sup>12</sup> and -6<sup>17</sup>. The myosin primed state  
86 structures show an open cleft between the U50 and L50 subdomains, and a  
87 primed lever<sup>12</sup>. However, previous attempts to image its attachment to actin have  
88 failed.

89 At steady state, attached primed myosin is rare because it is a weakly-bound  
90 state that rapidly transitions to a postPS strongly-bound state. Thus, the  
91 traditional high-resolution structural methods, X-ray crystallography and cryoEM  
92 plunge-freezing approaches, are unable to capture a primed actomyosin  
93 structure. Here, we have overcome these difficulties by using a myosin-5 mutant  
94 construct with higher affinity for actin<sup>18</sup> and an increased lifetime of the attached  
95 primed state<sup>19</sup>, and by using a microspray method for cryoEM specimen  
96 preparation<sup>20</sup> that permits millisecond time resolution. We present a structure of  
97 primed actomyosin at 4.4 Å global resolution, which shows how the myosin motor  
98 interacts with F-actin in its primed state to initiate force generation and directly  
99 demonstrate the swinging lever mechanism.

100

### 101 **Trapping primed actomyosin by time-resolved cryoEM**

102 To trap the actomyosin primed complex, we pre-incubated a myosin-5 construct  
103 (motor domain plus 1 IQ light-chain binding domain) with ATP for ~2s, allowing  
104 the myosin to bind and hydrolyse ATP, so it was primed for actin binding<sup>19</sup>. This  
105 was then mixed rapidly with F-actin, sprayed onto an EM grid, and plunge-frozen  
106 to trap the reaction after 10 or 120 ms using our custom-built device (see Methods  
107 and Extended Data Fig. 1)<sup>20,21</sup>. We used a myosin-5 mutant with an S<sup>217</sup>A  
108 mutation in switch 1 in the nucleotide binding pocket and DDEK<sup>594-597</sup> deletion in

109 loop 2 (Extended Data Fig. 2). S<sup>217</sup>A slows actin-activated Pi release (198 s<sup>-1</sup> to  
110 16 s<sup>-1</sup>)<sup>19</sup> and the deletion increases the affinity of the myosin-5-ADP-Pi primed  
111 state for F-actin ~10 fold<sup>18</sup>. This double mutant motor is fully functional in actin-  
112 motility assays and has a maximum actin-activated Pi-release rate of 13 s<sup>-1</sup>  
113 (Extended Data Fig. 3).

114 We chose two timepoints at which to vitrify the myosin-actin mixture, 10 and 120  
115 ms. At 10 ms, the maximum speed of the setup, based on the kinetic data, we  
116 expected the majority of actomyosin complexes to be in the primed state,  
117 whereas at 120 ms, a higher proportion of these would have transitioned to a  
118 postPS state, ensuring that any intermediate states between the primed and  
119 postPS could be captured (see Extended Data Fig. 3).

120 The time-resolved cryoEM data yielded two distinct classes of actomyosin-5  
121 structures, which we identified as the primed and postPS states, and solved to  
122 global resolutions of 4.4 and 4.2 Å, respectively (Extended Data Fig. 4). CryoEM  
123 density maps were fitted with atomic models to enable detailed interpretation,  
124 complemented by molecular dynamics simulations (see Methods, and Extended  
125 Data Table 1 & 2). Calmodulin density in all the EM maps is weak, indicating low  
126 occupancy of the heavy chain by calmodulin. The postPS actomyosin structure  
127 was similar to previous structures of strongly-bound states<sup>15</sup>.

128 The lever swing mechanism predicts that upon mixing of primed myosin with F-  
129 actin, primed actomyosin will initially predominate with postPS actomyosin  
130 accumulating over time. We found that 62 % of actomyosin complexes were in  
131 the primed state at 10 ms (Extended Data Fig. 5). At 120 ms, the proportion of  
132 primed actomyosin complexes was reduced to 36 % concomitant with an  
133 increase in postPS complexes, in reasonable agreement with a Pi-release rate of  
134 13 s<sup>-1</sup> (Extended Data Fig. 3d). Intermediate states were not detected despite  
135 extensive 3D classification and masking (Extended Data Fig. 4). This time-  
136 dependence of conformation directly demonstrates the swinging lever  
137 mechanism.

138

### 139 **Structure of actomyosin in the primed state**

140 In the primed state, myosin interacts with actin through its L50 domain (Fig. 1,  
141 Supplementary Video 1). The central actomyosin interface is formed between two  
142 neighbouring actin subunits and the myosin helix-loop-helix (HLH) motif (Fig. 1a-  
143 e), with additional interactions between actin and myosin loop2 and myosin loop3

144 completing the interface (Fig. 1f, g). The main contacts are primarily hydrophobic  
145 in nature, supplemented by electrostatic interactions. The HLH-actin interactions  
146 are the same as observed for the strong-binding states<sup>22</sup>, largely conserved  
147 across myosin classes in higher eukaryotes<sup>23</sup>. Thus, the orientation of the primed  
148 motor domain when docked onto actin resembles that of strongly-bound states  
149 except that the U50 does not interact with actin in primed actomyosin (Fig. 1b).  
150 Residues at the tip of the HLH loop (M515, P516) fit into a hydrophobic pocket  
151 on actin created by conserved residues in the pointed-end F-actin (-actin)  
152 subdomain-1 (I345-L349) and subdomain-3 (A144), and the +actin subdomain-2  
153 D-loop (M44-M47). Residues E511, K514 and K517 in the HLH motif can form  
154 hydrogen bonds with S350/T351, S348, and G146 backbone respectively (Fig.  
155 1e).

156 Myosin loop2 is flexible and poorly resolved in the primed state, as in most other  
157 actomyosin structures<sup>15,22</sup>. Yet, the C-terminal portion of loop2 (residues 628-  
158 632) has appreciable density that adopts an elongated conformation, reaching  
159 out parallel to the actin surface, allowing positively charged residues K629 and  
160 K632 to interact with the negatively charged D24 and D25 in -actin subdomain-1,  
161 respectively (Fig. 1f). A ridge of weaker density extends further along the surface  
162 of the actin suggesting that more of loop2 may be associated with the actin  
163 surface. In myosin loop3, M543 can interact hydrophobically with residues V96  
164 and A97 of +actin subdomain-1, enabling R542 to form an ionic interaction with  
165 E99 of +actin subdomain-1 (Fig. 1g).

166 The converter is in a primed position within the motor domain, and the orientation  
167 of the motor domain on actin results in the emerging lever helix pointing along  
168 the actin axis towards the pointed end, at an angle of  $\sim 52^\circ$  to the actin axis.

169 The N-terminal residues of actin (residues 1-4, DEDE), which are unresolved in  
170 most actin structures, reach out to interact with Helix W of the myosin L50  
171 subdomain and loop2. Actin residues D1 and E2 interact with H637 and N641 in  
172 helix W respectively, and the acetyl group of the acetylated N-terminal residue  
173 D1 interacts with H631 in loop2 (Fig. 1h). These N-terminal actin interactions with  
174 myosin lead to subtle changes in primed myosin structure, described below, that  
175 may suggest how actin activates myosin ATPase activity.

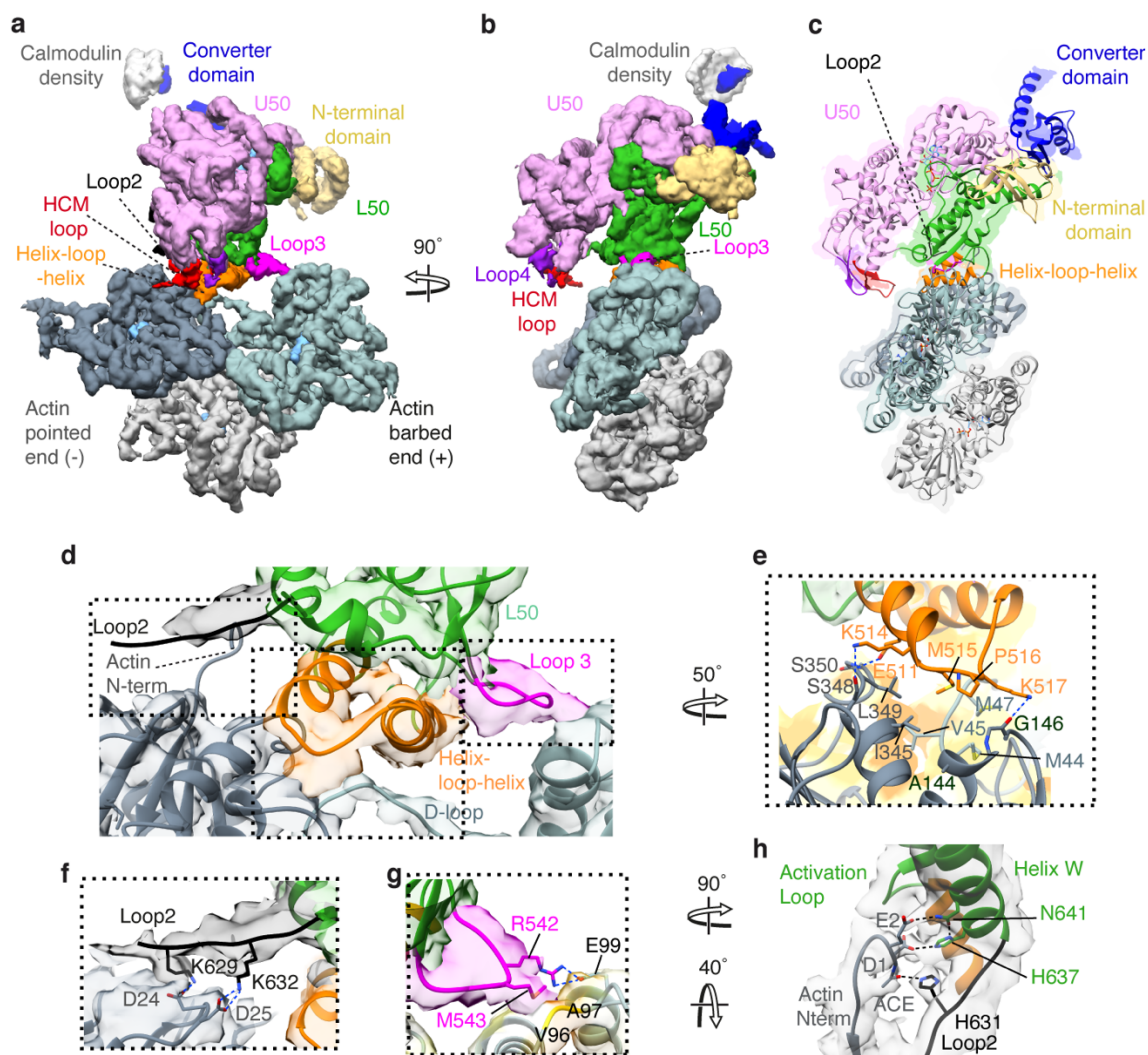

176  
177

178 **Figure 1. Structure of the primed actomyosin-5 complex.** (a, b) CryoEM  
179 density map of the primed actomyosin-5 complex, segmented and coloured by  
180 myosin subdomains and actin chains as indicated (with central three actin  
181 subunits displayed). Actin subunits are shown in slate grey(-end), blue-grey  
182 (+end), and light grey. Map thresholded to show secondary structure (myosin  
183 0.085, actin 0.2) and shown (a) in side view of F-actin and (b) in end-on view of  
184 F-actin, looking towards the pointed end. (c) Backbone depiction of atomic model  
185 of primed actomyosin-5, fitted into the EM density map, viewed as in (b). (d)  
186 Magnified side view of the actomyosin interface, contacts are made by (e) the  
187 myosin HLH motif, (f) loop2 (threshold 0.007\*) and (g) loop3. Relevant interacting  
188 residues are labelled and shown. In (e) and (g), HLH and actin segmented maps  
189 are coloured by hydrophobicity (orange most hydrophobic to white hydrophilic) to  
190 highlight hydrophobic interactions, especially the hydrophobic pocket formed by  
191 the two neighbouring actin subunits into which the tip of the HLH motif fits. (h)  
192 Magnified view showing the N-terminal residues of the -actin subunit (slate grey),  
193 side chains of D1, E2 and acetyl group (ACE) of D1, reaching out to interact with  
194 Helix W of the L50 domain, and loop2, at H637 and N641, and H631 respectively  
195 (EM density threshold 0.007\*). DeepEMhancer post-processed map depicted in  
196 (a-e, g), and \*RELION post-processed map in (f,h).

## 197 **Structural changes in primed myosin upon actin binding**

198 The time-resolved cryoEM data contained unbound myosin-5 molecules  
199 providing us with the opportunity to directly compare myosin structure in the  
200 unbound and actomyosin states (Fig. 2 and Supplementary Video 2). Unbound  
201 myosin motors from the 120 ms data were analysed to produce an EM map with  
202 global resolution of 4.9 Å (Extended Data Fig.6). This revealed that unbound  
203 myosin motors were in a primed state, vitrified prior to productive actin binding.  
204 The crystal structure of the myosin-5c motor domain trapped in the primed state  
205 by use of ADP-vanadate (PDB ID: 4ZG4) was well accommodated within the  
206 cryoEM density<sup>24</sup>, except in the position of the converter domain and relay helix  
207 (Extended Data Fig. 7a-e). Thus, flexible fitting of the crystal structure in the map  
208 was used to produce a model of our myosin-5a construct in the unbound primed  
209 state (Extended Data Fig. 7a,c,e).

210 The myosin models for unbound primed myosin-5 and primed actomyosin-5 are  
211 very similar (0.80 Å RMSD from global alignment of the motor domains across  
212 708 C $\alpha$  atom pairs) yet subtle changes are seen in the flexible regions, especially  
213 in the position of the converter domain and HelixD (Extended Data Fig. 7f,g).  
214 When the two structures are aligned on the main actomyosin binding interface,  
215 the HLH (residues 505-530) alone (Fig. 2a), the entire U50 is observed to be  
216 displaced with the largest shift in the position of HelixD (Fig. 2b). This suggests  
217 that subtle structural changes in the myosin motor are induced by actin binding  
218 and propagated through the molecule.

219 In the bound state, with myosin anchored to actin through the HLH, the rest of  
220 the L50 moves downwards, relative to the actin axis, so that the U50 domain is  
221 rotated circumferentially around F-actin towards the converter, which lifts the  
222 HCM loop and loop4 further away from the actin surface (Fig. 2a,c,  
223 Supplementary Video 2). The interaction of the N-terminal residues (1-2) of actin  
224 with the neighbouring HelixW and loop2 (Fig. 1h) could drive this motion. The C-  
225 terminal end of loop2 extends to contact the actin surface (Fig. 1e), and the  
226 'activation loop' (residues 501-504, between HelixQ and HelixR) protrudes further  
227 out from the axis of its neighbouring helices, reaching out for the actin surface  
228 (Fig. 2c). There is an increase in the bend of the relay helix when primed myosin  
229 binds to actin suggesting it is under additional strain (Fig. 2d, e). Yet interestingly,  
230 the converter hardly moves relative to the HLH motif (Fig. 2b), such that there is  
231 little movement of the lever when primed myosin binds to actin.

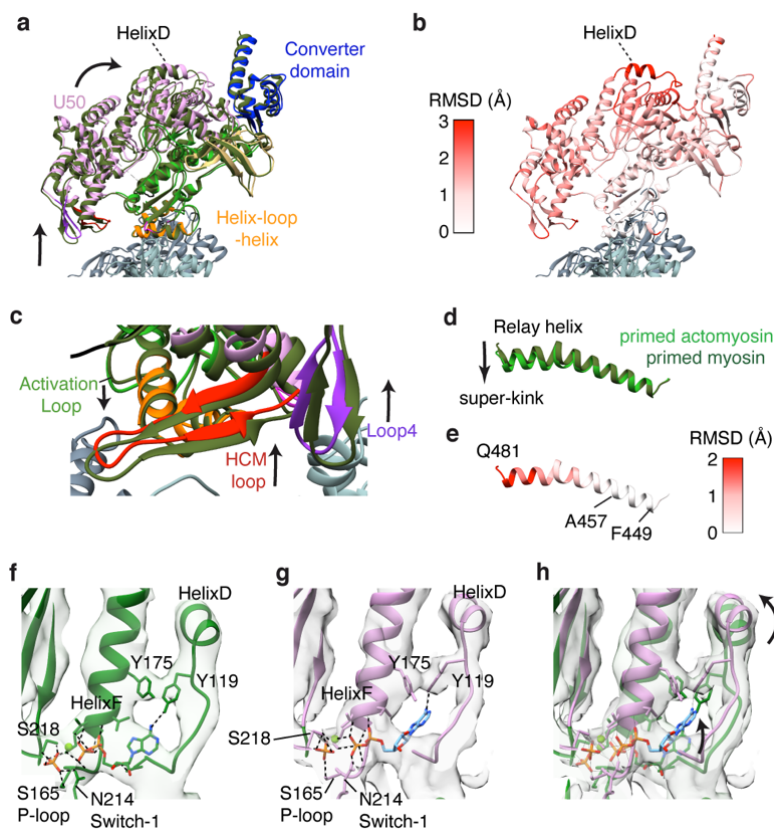

232  
233

234

235

236

237

238

239

240

241

242

243

244

245

246

247

248

249

250

251

252

253

**Figure 2: Comparison of myosin structure in the primed actomyosin complex with unbound primed myosin.** (a) Superposition of the primed actomyosin (coloured as in Fig. 1) and unbound primed myosin (forest green) aligned on the core primed actomyosin interface (HLH motif, residues 505-530). View towards actin pointed end. (b) Corresponding RMSD of myosin residues between primed actomyosin and primed myosin, showing greatest movement occurs in HelixD. The whole U50 is rocked back, around the actin axis, towards the converter domain, resulting in (c) the HCM loop and loop4 moving away from the actin surface. The activation loop also extends down, reaching out to the actin surface. (d) The myosin relay helix, when aligned on residues 449-457 at the start of the relay helix, is found to have additional kinking upon actin binding. (e) RMSD of primed actomyosin relay helix relative to primed myosin. (f) Unbound primed myosin and (g) primed actomyosin models focussed on HelixD, Y119, Y175 and nucleotide, overlaid with their respective cryoEM maps, thresholded equivalently. (h) Overlay of (f) and (g) showing movement of HelixD upon binding of myosin to actin causes rearrangement of tyrosine residues Y119 and Y175, resulting in larger freedom of placement of ADP in the nucleotide binding pocket. The Pi is anchored by interactions with P-loop/HelixF (S165/K169) and Switch-1 (N214/S218). Primed actomyosin RELION post-processed map depicted throughout.



254 The movement of HelixD results in the rearrangement of the position of Y175 and  
255 Y119 (Fig 2. f,g,h and see Supplemental Video 2). These residues interact with  
256 the adenosine ring of the nucleotide and the rearrangement likely results in less  
257 restraint on ADP in the nucleotide pocket. This is supported by the observation  
258 of weaker density for the adenosine ring in the primed actomyosin EM density in  
259 comparison to that in the unbound primed myosin EM density (Fig 2. f,g).  
260 Consequently, in the primed actomyosin model, refined with molecular dynamics  
261 in ISOLDE<sup>25</sup>, the ADP is placed further back into the pocket, towards HelixD,  
262 creating strain that may promote Pi dissociation from the ADP moiety since the  
263 Pi is anchored by interactions with the P-loop/HelixF (S165 and K169  
264 respectively) and Switch-1 (N214 and S218) (Fig 2. f,g,h). However, Pi cannot  
265 dissociate because its exit route is blocked as the salt bridge between R219 in  
266 switch-1 and E442 in switch-2, termed the backdoor, is still intact.

267

### 268 **Structural changes during the power stroke**

269 Comparison of the actomyosin primed and postPS states allows us to describe  
270 the structural changes that occur during the power stroke. The biggest change is  
271 the large-scale movement of the converter and light-chain binding domain (Fig.  
272 3a-e, Extended Data Fig. 8 and Supplementary Video 3), responsible for  
273 generation of external mechanical force. The lever swings through  $\sim 93^\circ$ ,  
274 predominantly along the actin axis, and is displaced azimuthally by only  $4^\circ$  right-  
275 handed (Fig. 3c-e), with a small ( $2.5^\circ$ ) right-handed torsion of the lever around its  
276 own axis. The N-terminal domain is displaced by  $\sim 10 \text{ \AA}$  orthogonally to the actin  
277 axis (Fig. 3e). Thus, the myosin-5 motor successfully converts complex internal  
278 movements into a simple swinging motion along actin and these data directly  
279 demonstrates the swinging lever mechanism.

280 Whilst the interactions between actin and the myosin L50 domain (HLH motif and  
281 loop3) remain largely unchanged between the primed and postPS state, the U50  
282 interactions are distinctly different (Fig. 3f, g). In the primed state, the HCM loop  
283 and loop4 are poorly resolved, indicating flexibility in this region, and both loops  
284 are too distant from the actin surface to form stable contacts with it (Fig. 3f). In  
285 the postPS state the U50 domain is rotated such that the actin-binding cleft is  
286 closed and the HCM loop and loop4 can interact with the actin surface, forming  
287 both hydrophobic and charged interactions (Fig. 3g & Extended Data Fig. 9a-d),  
288 as seen in previous strongly-bound actomyosin structures<sup>15,22,23</sup>. These

289 additional interactions increase the surface area of the binding interface from 375  
290 Å<sup>2</sup> in the primed state to 729 Å<sup>2</sup> in the postPS state, creating a much stronger  
291 binding interface and providing the structural basis for the weak to strong binding  
292 transition.

293 In the postPS actomyosin structure, the interactions of loop2 with -actin  
294 subdomain 1 are different to those seen in the primed structure (Fig 3h, i). The  
295 interactions of H631 with acetyl-D1 and K629 with D24 (Fig. 3h) are broken and  
296 the C-terminal portion of loop2 adopts a helical conformation with K629 and K633  
297 forming stronger ionic interactions with actin E2 (Fig. 3i). The preserved  
298 interaction of K632 in loop2 with D25 means that the change in loop2  
299 conformation, which shortens loop2, would rotate the U50 around towards the  
300 actin surface, resulting in formation of the second binding interface and cleft  
301 closure (see Supplementary Video 3). An interaction between residue K502 in  
302 the activation loop and E4 of actin is also formed in the postPS state (Extended  
303 Data Fig. 9e).

304 Within the nucleotide binding pocket, there are relative movements between  
305 switch-2, switch-1 and the P-loop that indicate that Pi has been released in the  
306 postPS structure (Fig. 3j, k). The salt bridge between R219 in switch-1 and E442  
307 in switch-2 (termed the backdoor) is intact in the primed actomyosin structure and  
308 broken in the postPS structure. Rotation of the U50 across the L50, resulting in  
309 cleft closure, displaces switch-1 and the P-loop away from switch-2 to open the  
310 backdoor and enable Pi release (see morph between primed and postPS  
311 actomyosin in Supplemental Video 3).

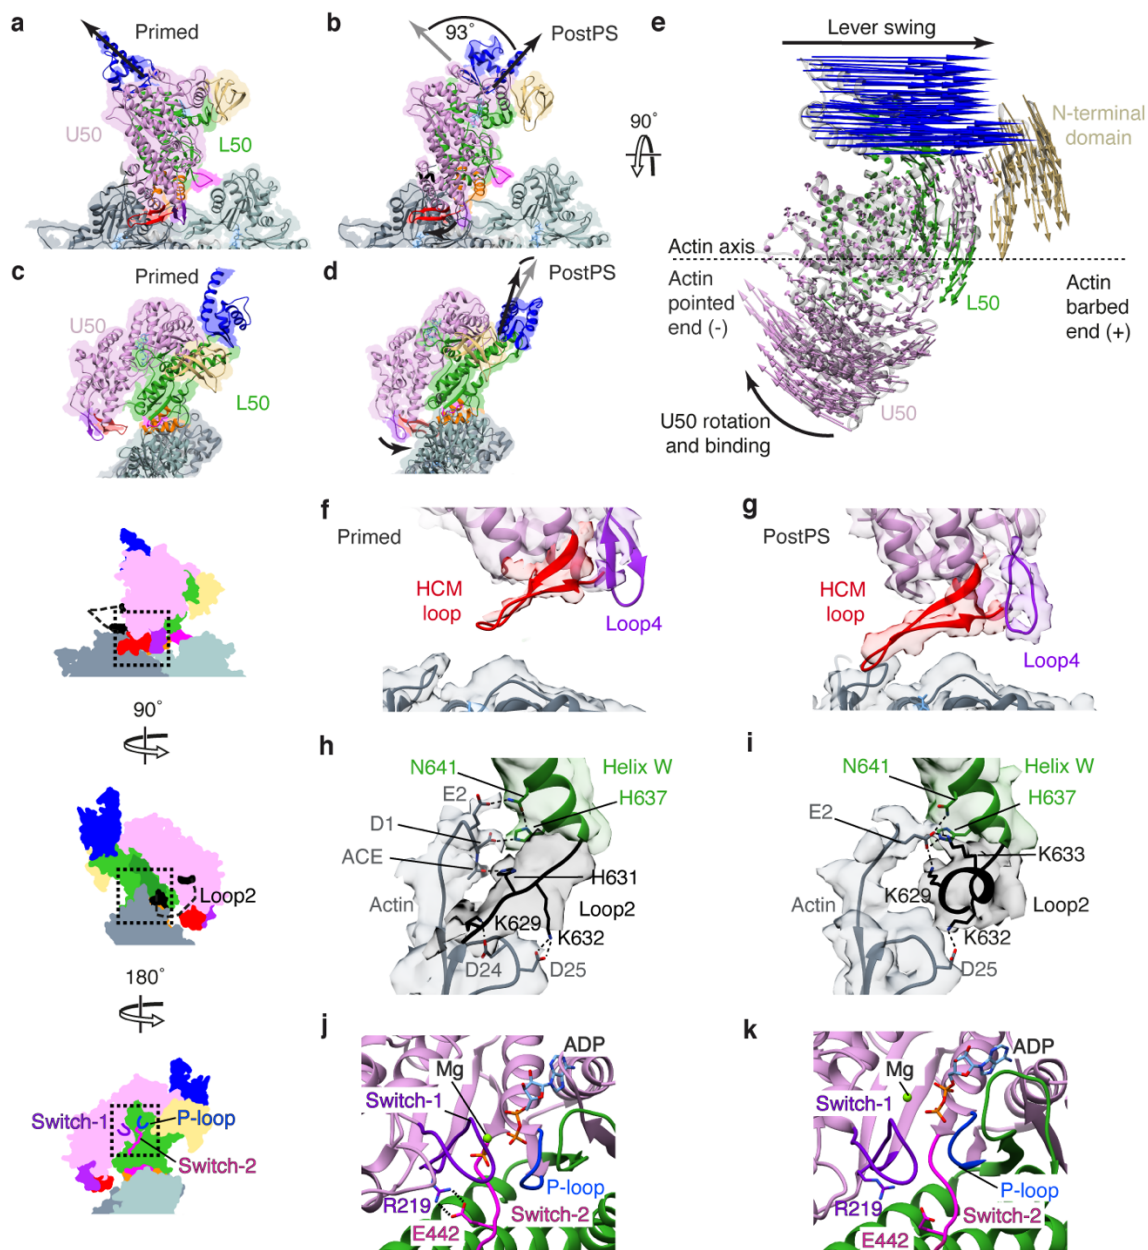

312

313

314

315

316

317

318

319

320

321

322

323

324

325

326

327

328

329

330

**Figure 3: Structural changes during the power stroke.** (a) Primed actomyosin structure (as shown in Fig. 1a) and (b) corresponding view of the postPS actomyosin structure with lever positions indicated by a black arrow. The lever swings  $\sim 93^\circ$  between structures, in a slight right-handed arch ( $4^\circ$ ). (c) In end-on view, we observe that primed actomyosin has an open actin-binding cleft, while (d) postPS actomyosin has a closed cleft. (e) In aerial view, vectors depict the movement of myosin residue  $C\alpha$  atoms between primed and postPS actomyosin states. The biggest motions are attributable to lever swing, U50 rotation and binding to actin, and displacement of the N-terminal domain. The HCM-loop and loop4 are distant from the actin surface in the (f) primed state but interact with actin in the (g) postPS state, EM density segmented and coloured by myosin subdomains (contour level 0.008). N-terminal actin interactions with loop2 and helixW are changed between (h) primed and (i) postPS states. Nucleotide binding site in (j) primed and (k) postPS structures. The 'backdoor' (salt bridge between R219 and E442) is opened through rotation of the U50 and switch-1 and P-loop moving away from switch-2. DeepEMhancer post-processed map depicted in (a-d, f, g), and \*RELION post-processed map depicted in (h, i).

331

332 Our postPS actomyosin-5 structure shows a closed actin-binding cleft as well as  
333 a postPS lever position (Fig. 3d) and has high similarity to previous structures of  
334 strongly-bound actomyosin complexes (ADP-bound or rigor states)<sup>15</sup>. The  
335 cryoEM density shows clear evidence for the presence of MgADP (Extended  
336 Data Fig. 9f) and we, therefore, identify the postPS state as ADP-bound  
337 actomyosin-5. We observe that the position of the lever is more similar to that  
338 observed in previous rigor structures (Extended Data Fig. 9g), rather than ADP-  
339 bound structures<sup>12,15</sup>. We also observe that the density for the magnesium ion in  
340 the nucleotide binding pocket (Extended Data Fig. 9h, i) is in a different position  
341 to that seen in other ADP-bound structures<sup>15</sup>. This could be due to the S217A  
342 mutation changing the Mg coordination, and may explain the 2-fold increase in  
343 ADP release rate for the S217A mutant compared to WT<sup>19</sup>, along with the change  
344 in lever position.

345

### 346 **Structural mechanism of myosin force generation and ATPase activation** 347 **on F-actin.**

348 The changes we observe between unbound primed myosin, primed actomyosin  
349 and postPS actomyosin allow us to propose the mechanism by which myosin  
350 generates movement and actin catalyses it (Fig. 4, Supplementary Video 4).

351 It is generally accepted that myosin initially binds weakly to actin through  
352 interactions between positively-charged residues of loop2 and negatively-  
353 charged residues in actin subdomain-1 (Fig. 4a)<sup>22</sup>, which are indeed seen in our  
354 primed structure (Fig1f). This brings the L50 in close proximity to the actin  
355 surface, enabling the stereospecific interaction between the L50 (HLH and loop3)  
356 and F-actin to form quickly after this initial interaction. This interaction triggers a  
357 significant rearrangement within the primed myosin (cocking back of the U50) to  
358 produce the primed actomyosin we observe (Fig. 4b). In the transition between  
359 primed and postPS states, we show that the U50 must rotate resulting in cleft  
360 closure and producing the strong binding interface required to sustain the force  
361 generated by lever swing (Fig. 4c-d). Yet, the question of how actin activates  
362 myosin ATPase activity still remains.

363 Actin N-terminal residues 1-4 are implicated in myosin ATPase activation, as  
364 deletion or mutation of these residues diminishes actin-activated ATPase  
365 activity<sup>26,27</sup>. We find that actin structure is almost unchanged between free actin,

366 primed actomyosin and postPS actomyosin, except in the N-terminal residues,  
367 which are disordered in free actin, become ordered in primed actomyosin and  
368 adopt a different conformation in postPS actomyosin (Extended Data Fig.10).  
369 Density for the D-loop in subdomain-2 is also stronger in the actomyosin  
370 structures in comparison to free actin due to stabilisation upon myosin binding.  
371 When primed myosin binds to F-actin, actin residues 1-2 interact with both HelixW  
372 and loop2. The interactions with HelixW provide stabilisation of the L50 and cause  
373 a slight rotation of the U50 back towards the converter domain (Fig. 4b), which  
374 results in HelixD movement creating strain in the nucleotide binding pocket that  
375 would enable Pi dissociation, yet Pi cannot dissociate because the back door is  
376 still closed (Fig. 4e,f). These initial movements catalyse a subsequent  
377 rearrangement of the actin N-terminal residues that change their interactions with  
378 loop2 and helixW, so that the C-terminal end of loop2 is stabilised (Fig. 3i) and  
379 actin E4 interacts with the activation loop. The stabilisation of loop2 at its C-  
380 terminal end, means that the U50 domain and strut<sup>22</sup> are pulled towards the actin  
381 surface, promoting cleft closure (Fig. 4c). As interactions of the U50 with the actin  
382 surface are formed, committing myosin to cleft closure, switch-1 and the P-loop  
383 are moved away from switch-2, opening the backdoor, and concomitant  
384 reshaping of the nucleotide-binding pocket pushes Pi into the Pi release tunnel  
385 (Fig. 4g). Thus, actin catalyses myosin ATPase activity by accelerating cleft  
386 closure and Pi dissociation.

387 Cleft closure is made energetically favourable in the presence of actin, due to the  
388 formation of additional interfaces between the myosin U50 and -actin, and the  
389 distortions that occur upon binding of primed myosin to actin act to accelerate Pi  
390 release. Interactions of Pi with positively-charged residues in the Pi release  
391 tunnel<sup>17</sup> could delay its release into solution and explain why kinetic<sup>7,28</sup> and  
392 single-molecule measurements<sup>14</sup> suggest that Pi is released after the  
393 powerstroke occurs<sup>10</sup>. Cleft closure causes the transducer to twist and the relay  
394 helix to straighten, concomitant with lever swing, producing the powerstroke and  
395 the postPS structure (Fig. 4h).

396 In the absence of load, there is tight coupling between cleft closure and lever  
397 swing. However, under strain, the lead head of two-headed myosin-5 has been  
398 shown to rapidly release Pi<sup>29</sup> yet adopt a strongly-bound state with a primed  
399 lever<sup>30,31</sup>. This is consistent with Pi displacement preceding cleft closure, which

400 commits myosin to lever movement. The activation loop may also have a role  
401 here in stabilising the actomyosin interface to decrease detachment under load<sup>32</sup>.  
402 The motions of cocking back around the actin axis, and cleft closure are in planes  
403 almost orthogonal to that of lever swing, such that neither would be impeded in  
404 the presence of load on the lever along the F-actin axis. So rather cleverly,  
405 myosin clamps itself onto actin without producing any axial movement. Thus,  
406 when the lever tries to swing forward against a restraining force, the axial force  
407 doesn't tend to re-open the cleft. This is akin to how a chameleon climbs up a  
408 stick. This feature has important implications for function across all myosin  
409 classes.

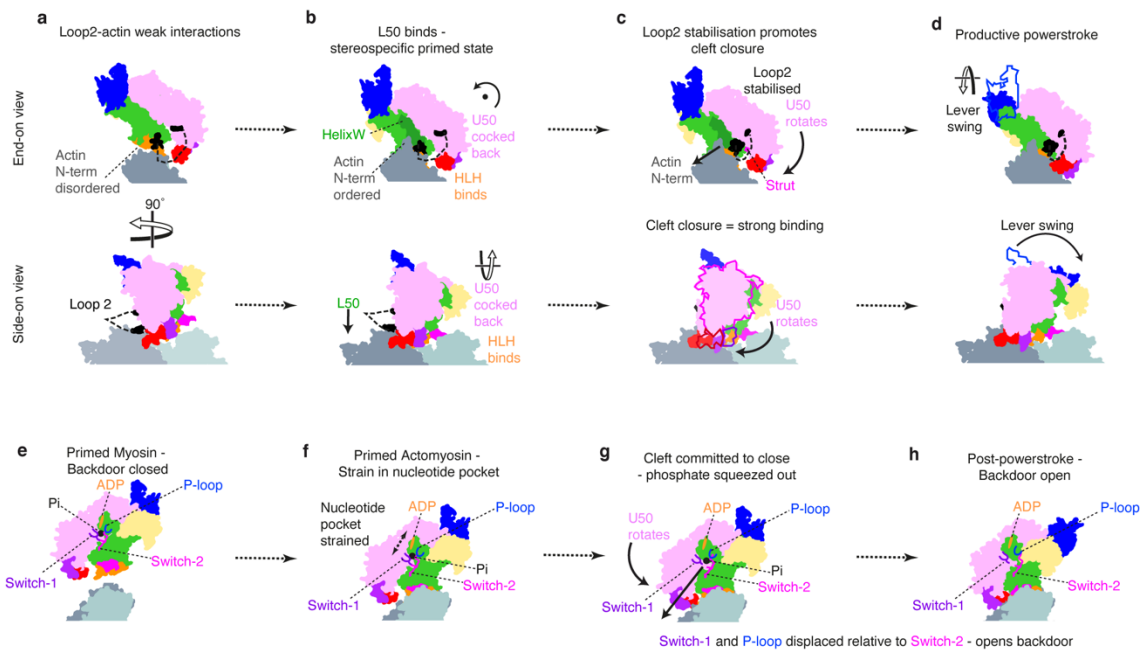

410

411 **Figure 4: Models of myosin force generation and ATPase activation on F-**  
 412 **actin.** (a-d) force generation, upper row: end-on view; lower row: side view. (e-h)  
 413 ATPase activation (a) Primed myosin initially binds weakly to actin through  
 414 electrostatic interactions of loop2 with actin subdomain-1. This brings the L50 of  
 415 myosin in close proximity to the actin surface, enabling formation of the  
 416 stereospecific primed actomyosin state. (b) HLH binding enables the actin N-  
 417 terminal residues 1-2 to interact with HelixW and loop2, resulting in the U50 being  
 418 cocked back towards the converter domain, rotated around the F-actin axis. (c)  
 419 Rearrangement of N-terminal actin interactions with HelixW and loop2 result in  
 420 loop2 stabilisation at its C-terminal end. This shortens loop2, rotating the U50 and  
 421 attracting the negatively-charged strut to positively-charged loop2, promoting  
 422 cleft closure. (d) Cleft closure results in the strong binding interface needed to  
 423 sustain force and concomitantly results in twisting of the transducer, straightening  
 424 of the relay helix and lever swing. (e) In the unbound primed state, the backdoor  
 425 is closed, prohibiting Pi release. (f) Upon binding of primed myosin to actin,  
 426 cocking back of the U50 towards the converter creates strain in the nucleotide  
 427 pocket, with the ADP drawn away from the well-coordinated Pi, prohibiting  
 428 reversal of hydrolysis and promoting Pi release. (g) As the U50 rotates, and the  
 429 initial interactions between the U50 and the actin surface are formed, switch-1  
 430 and the P-loop are displaced relative to switch-2, the backdoor is opened, and Pi  
 431 is squeezed out into the Pi release tunnel. (h) In the PostPS state, Pi has been  
 432 released and the lever has swung and the backdoor is open. Pi re-entry into the  
 433 nucleotide pocket is highly unfavourable.

## 434 **Implications for two-headed myosin-5**

435 By overlaying the primed and postPS state actomyosin structures we were able  
436 to visualise the lever swing along actin (Fig. 5a-c). If we extend our structures to  
437 full lever length (see Methods), the axial working stroke is ~34 nm, which is  
438 consistent with the distance between preferred binding sites on actin<sup>33</sup> (Fig. 5a).  
439 There is a small (4°) right-handed component to the lever swing (Fig. 5b-c) and  
440 a small (2.5°) right-handed torsion of the lever around its own axis, such that the  
441 lever tips are displaced from one another approximately 7° azimuthally around  
442 the actin axis.

443 To mimic the walking molecule, we placed a postPS and primed motor, with full-  
444 length levers, 13 actin subunits apart along an actin filament, as if they were the  
445 leading and trailing head of a myosin-5 double-headed molecule (Fig. 5d-f). The  
446 two ends of the levers were slightly displaced from each other azimuthally but  
447 met at the same point axially along the filament. This shows that only slight  
448 bending of the levers or variation in actin helical symmetry<sup>33</sup> is needed to unite  
449 the heads onto the coiled tail, as is observed by EM<sup>30,34</sup>. During walking, there is  
450 thus no need for a forward diffusive search by the detached head.

451 Together, this means that the myosin-5 motor is able to generate motion very  
452 effectively, producing an almost linear motion over a distance that is close to the  
453 typical step size along actin.

454

## 455 **Conclusions**

456 By use of time-resolved cryoEM we have captured an actomyosin complex in the  
457 primed state and solved its structure to high resolution (4.4 Å). Primed myosin  
458 initially binds actin through its lower 50 kDa subdomain. Due to the high  
459 conservation in the primed actomyosin interface, the structure of this state is likely  
460 conserved across myosin classes and as such, provides a valuable model for  
461 understanding the effects of disease-causing myosin mutations. Our time-  
462 resolved data show a primed actomyosin structure transitioning to a post-  
463 powerstroke structure, directly demonstrating the swinging lever mechanism, and  
464 enabling us to propose a mechanism for how actin catalyses it.



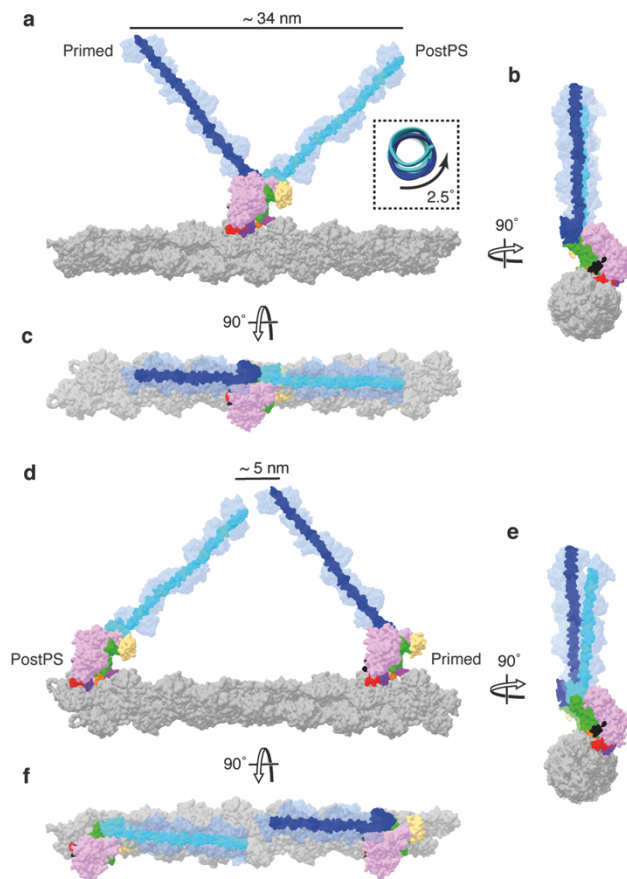

465

466

467 **Fig. 5. Myosin-5 working stroke and walking on F-actin.** (a) Overlay of primed  
468 and postPS actomyosin structures with full-length levers, coloured in dark blue  
469 and cyan respectively, on actin in side view. A working stroke of approximately  
470 34 nm is seen as well as little rotation of the lever as highlighted. (b) Top and (c)  
471 end-on views of the actin filament, show a very small azimuthal displacement of  
472 the lever tips ( $7^\circ$ ). When a postPS and a primed myosin are positioned 13 actin  
473 subunits apart, the lever ends meet in a similar position along the actin axis, as  
474 observed in (d) side, (e) top and (f) end-on views of the actin filament. Note that  
475 this actin filament has a rotation per subunit of  $-166.6^\circ$ . Small changes in this  
476 value change the relationship of the lever ends in (d-f).

## 477 **Methods**

478

### 479 *Sample preparation*

480 Rabbit skeletal actin in monomeric form (G-Actin) was prepared as previously  
481 described<sup>35</sup>. Polymerisation to F-actin was done by mixing ~ 300  $\mu$ M G-Actin with  
482 10 % (v/v) cation exchange buffer (3 mM MgCl<sub>2</sub>, 11 mM EGTA), incubating for 5  
483 min on ice, adding 10 % (v/v) polymerization buffer (120 mM MOPS, 300 mM  
484 KCl, 12 mM MgCl<sub>2</sub>, 1 mM EGTA) and incubating the mixture overnight on ice.  
485 Mouse myosin-5a head fragment (subfragment 1, S1), coding for amino acids 1–  
486 797 (1 IQ calmodulin-binding motif) and carrying the switch 1 S<sup>217</sup>A mutation, loop  
487 2 DDEK<sup>594-597</sup> deletion and C-terminal Flag purification tag (Extended Data Fig.  
488 2), was expressed using pVL1392 baculovirus transfer vector and purified as  
489 previously described<sup>19</sup>. Disodium ATP was obtained from Roche and ADP was  
490 obtained from Sigma Aldrich.

491

### 492 *Kinetic measurements*

493 Transient kinetics of actomyosin ATP hydrolysis were measured by use of an  
494 Hitech Scientific stopped-flow with single or double mixing, where appropriate.  
495 All stopped-flow experiments were carried out at 20°C with a final buffer  
496 concentration of 37.5 mM KAc, 25 mM KCl, 10 mM MOPS (pH 7.0), 2.25 mM  
497 MgCl<sub>2</sub>, 0.1 mM EGTA, 0.25 mM DTT in the cell. See Extended Data Fig.3 for  
498 specific method information.

499

### 500 *Time-resolved cryoEM grid preparation*

501 Time-resolved cryoEM experiments were done using a custom-built setup  
502 previously described<sup>21</sup> with modifications to allow two mixing steps. A photo and  
503 schematic of the setup are shown in Extended Data Fig 1. The flow rates for each  
504 individual syringe were 2.1  $\mu$ L/s. In the first mixing step, myosin-5 at 51  $\mu$ M in 10  
505 mM MOPS, 100 mM KCl, 3 mM MgCl<sub>2</sub>, 0.1 mM EGTA pH 7.0 was mixed 1:1 with  
506 1 mM ATP in reaction buffer (10 mM MOPS, 50 mM KAc, 2 mM MgCl<sub>2</sub>, 0.1 mM  
507 EGTA pH 7.0). The myosin-nucleotide mixture at a flowrate of 4.2  $\mu$ L/s was met  
508 by two 2.1  $\mu$ L/s flows of F-Actin at 25  $\mu$ M (subunit concentration in reaction buffer)  
509 in the flow focussing region of the spray nozzle to create an actin-myosin mixture  
510 comprising 13  $\mu$ M myosin, 13  $\mu$ M actin, 250  $\mu$ M ATP, 10 mM MOPS, 38 mM KAc,

511 25 mM KCl, 2 mM MgCl<sub>2</sub>, 0.1 mM EGTA at pH 7.0, and a total flowrate of 8.4  
512  $\mu$ L/s. This final mixture was sprayed onto an EM grid.

513 The average time delay from the first mixing step to the spray nozzle was 2.2 s,  
514 given a flowrate of 4.2  $\mu$ L/s, tube length of 7 cm, inner diameter (I.D.) of 0.38 mm  
515 and dead volumes of 1.0 and 0.3  $\mu$ L for mixer and nozzle, respectively. The spray  
516 nozzles used here have been described and characterized previously<sup>20,36</sup>. The  
517 nozzle to grid distance at the point of sample application was 1.3 cm and the  
518 droplet speed  $\geq$ 30 m/s, resulting in a time-of-flight for the droplets of less than 1  
519 ms. With a vertical distance of 1.7 cm between spray nozzle and liquid ethane  
520 surface and a grid speed of 1.8 m/s, the time-delay was calculated to be 10 ms  
521 ( $10 \pm 2$  ms). The nozzle was operated in spraying mode with a spray gas pressure  
522 of 2 bar.

523 A longer time-delay of  $\sim$ 120 ms was obtained by increasing the vertical distance  
524 between nozzle and ethane surface to 5.2 cm and pausing the grid after passing  
525 the spray. In these experiments, the sample mixture was incubated for an  
526 additional  $\sim$ 100 ms on-grid, before plunging into liquid ethane for vitrification. The  
527 total time delay from droplet application to vitrification was 120 ms ( $122 \pm 5$  ms),  
528 including deceleration, 100 ms pause and acceleration. Otherwise, the conditions  
529 for grid preparation were the same as for the 10 ms timepoint.

530 All grids were prepared at room temperature ( $\sim$ 20 °C) and at  $>$ 60 % relative  
531 humidity in the environmental chamber of the time-resolved EM device. Self-  
532 wicking grids were supplied by SPT Labtech and used after glow discharge in a  
533 Cressington 208 Carbon coater with glow-discharge unit for 60 s at 0.1 mbar air  
534 pressure and 10 mA. Four replicate grids were prepared for each timepoint, 3 of  
535 which were taken forward for data collection.

536

### 537 *Data processing and model building*

538 Data were collected on a Titan Krios microscope equipped with a Gatan K2 direct  
539 electron detector operated in counting mode. The main data collection and  
540 processing parameters are listed in Extended Data Table 1. A schematic  
541 overview of the processing pipeline is given in Extended Data Fig. 3. Data from  
542 3 grids were collected for each timepoint. All processing was done using RELION-  
543 3.1<sup>37</sup>, unless otherwise mentioned. Micrographs were corrected for beam-  
544 induced motion using MotionCor2 and CTF estimation was done using GCTF  
545<sup>38,39</sup>. Actin filaments were manually picked and processed using standard helical

546 processing methods (Extended Data Fig. 3&4)<sup>40</sup>. After CTF-refinement and  
547 Bayesian polishing, all 6 datasets were combined and a helical consensus  
548 structure calculated (Extended Data Fig. 4c). Using focussed 3D classification  
549 without alignment (non-helical) and a mask that covered the central myosin  
550 binding site (Extended Data Fig. 4d), particles were classified into primed  
551 actomyosin, postPS actomyosin (Extended Data Fig. 4c, e), free actin and a small  
552 fraction of particles left unassigned. The final reconstruction of free actin was  
553 obtained by helical refinement. Primed and postPS actomyosin were refined  
554 helically and after partial signal subtraction, as single particles (Extended Data  
555 Fig. 4f-i). Post-processing was performed in RELION and in DeepEMhancer<sup>41</sup>.  
556 Processing parameters for free myosin-5 are listed in Extended Data 3. Free  
557 myosin-5 particles were picked from a subset of micrographs of the 120 ms time-  
558 resolved data. Because of thicker ice, free myosin particles were not picked from  
559 the 10 ms data. After one round of 2D classification, good particles were used to  
560 train a crYOLO model<sup>42</sup>. With the trained model, particles were picked from the  
561 entire 120 ms dataset, leading to a final selection of 23930 particles after one  
562 round of 2D and one round of 3D classification. The final 3D refinement after  
563 Bayesian polishing was done using non-uniform refinement in cryoSPARC<sup>43</sup>.  
564 Homology models were generated using Modeller within Chimera based on the  
565 PDB files shown in Extended Data Table 2<sup>44,45</sup>. Model building was done using  
566 coot<sup>46</sup>, with subsequent refinement of the nucleotide pocket in ISOLDE,  
567 implementing the hydrogen bonding coordination to the phosphates as described  
568 in Forgacs *et al.*<sup>19</sup> and TYR119 coordination as described in Pospich *et al.*<sup>15</sup> as  
569 harmonic restraints during flexible fitting<sup>25</sup>. Real space refinement was performed  
570 using Phenix<sup>47</sup>. To permit elucidation of interactions occurring at the actomyosin  
571 interface, we used molecular dynamics simulations. These were performed with  
572 the Amber FF14SB forcefield and a GBSA implicit solvent model following the  
573 method described in Scarff *et al.*<sup>48</sup> Interactions that were observed in at least 50  
574 % of the simulations were included in the model. Structures were visualised in  
575 Chimera. Videos were generated by use of Chimera, Adobe Aftereffects and  
576 Adobe Premiere. For the generation of movie 4, we separated out the motions of  
577 cleft closure and powerstroke into a suggested time sequence to produce a model  
578 of force generation. To achieve this, a chimeric model of primed and postPS  
579 actomyosin was generated (myosin chain numbering: aa1-128 primed, aa129-  
580 449 postPS, aa450-507 primed, aa508-632 post, aa633-763 primed).

581

582 *Myosin-5 full-length lever model*

583 A 17 actin subunit filament was created by seven superpositions of our three actin  
584 subunit model. Full-length levers (to residue 909) were added onto our primed  
585 and PostPS actomyosin structures by super-imposing levers from PDB ID 7YV9  
586 chain A, aligned on the converter domain (residues 699-750). Lever swing and  
587 azimuthal displacement were measured using the measurement tools in  
588 Chimera.

589

590 *Data availability*

591 The electron density maps and atomic models for unbound primed myosin-5,  
592 primed actomyosin-5 and postPS actomyosin-5 have been deposited into EMDB,  
593 with accession codes EMD-19031, EMD-19013 and EMD-19030, and the PDB  
594 with accession codes 8RBG, 8R9V and 8RBF, respectively.

595 The following models were used for comparison purposes in our study,  
596 actomyosin-5 rigor structures PDB IDs: 7PLT, 7PLU, 7PLV, 7PLW, 7PLZ and  
597 actomyosin-5 strong-ADP structures PDB IDs: 7PM5, 7PM6, 7PM7, 7PM8,  
598 7PM9.

## 599 References

600

- 601 1 Huxley, H. E. & Kress, M. Crossbridge behaviour during muscle  
602 contraction. *Journal of Muscle Research & Cell Motility* **6**, 153-161  
603 (1985). <https://doi.org/10.1007/BF00713057>
- 604 2 Hartman, M. A. & Spudich, J. A. The myosin superfamily at a glance.  
605 *Journal of cell science* **125**, 1627-1632 (2012).
- 606 3 Robert-Paganin, J., Pylypenko, O., Kikuti, C., Sweeney, H. L. &  
607 Houdusse, A. Force generation by myosin motors: a structural  
608 perspective. *Chemical Reviews* **120**, 5-35 (2019).
- 609 4 Schröder, R. R. *et al.* Three-dimensional atomic model of F-actin  
610 decorated with Dictyostelium myosin S1. *Nature* **364**, 171-174 (1993).
- 611 5 Rayment, I. *et al.* Structure of the actin-myosin complex and its  
612 implications for muscle contraction. *Science* **261**, 58-65 (1993).
- 613 6 Conibear, P. B., Bagshaw, C. R., Fajer, P. G., Kovács, M. & Málnási-  
614 Csizmadia, A. Myosin cleft movement and its coupling to actomyosin  
615 dissociation. *Nature Structural & Molecular Biology* **10**, 831-835 (2003).  
616 <https://doi.org/10.1038/nsb986>
- 617 7 Trivedi, D. V. *et al.* Direct measurements of the coordination of lever arm  
618 swing and the catalytic cycle in myosin V. *Proceedings of the National  
619 Academy of Sciences* **112**, 14593-14598 (2015).
- 620 8 Huxley, H. E. *et al.* Changes in the X-ray reflections from contracting  
621 muscle during rapid mechanical transients and their structural  
622 implications. *Journal of Molecular Biology* **169**, 469-506 (1983).  
623 [https://doi.org:https://doi.org/10.1016/S0022-2836\(83\)80062-X](https://doi.org/https://doi.org/10.1016/S0022-2836(83)80062-X)
- 624 9 Geeves, M. A. & Holmes, K. C. Structural mechanism of muscle  
625 contraction. *Annual review of biochemistry* **68**, 687-728 (1999).
- 626 10 Debold, E. P. Recent insights into the relative timing of myosin's  
627 powerstroke and release of phosphate. *Cytoskeleton* **78**, 448-458 (2021).  
628 <https://doi.org:https://doi.org/10.1002/cm.21695>
- 629 11 Robert-Paganin, J., Pylypenko, O., Kikuti, C., Sweeney, H. L. &  
630 Houdusse, A. Force Generation by Myosin Motors: A Structural  
631 Perspective. *Chemical Reviews* **120**, 5-35 (2020).  
632 <https://doi.org/10.1021/acs.chemrev.9b00264>
- 633 12 Wulf, S. F. *et al.* Force-producing ADP state of myosin bound to actin.  
634 *Proceedings of the National Academy of Sciences* **113**, E1844 LP -  
635 E1852 (2016). <https://doi.org/10.1073/pnas.1516598113>
- 636 13 Menten, A. *et al.* High-resolution cryo-EM structures of actin-bound  
637 myosin states reveal the mechanism of myosin force sensing.  
638 *Proceedings of the National Academy of Sciences* **115**, 1292 LP - 1297  
639 (2018). <https://doi.org/10.1073/pnas.1718316115>
- 640 14 Woody, M. S., Winkelmann, D. A., Capitanio, M., Ostap, E. M. &  
641 Goldman, Y. E. Single molecule mechanics resolves the earliest events  
642 in force generation by cardiac myosin. *Elife* **8**, e49266 (2019).
- 643 15 Pospich, S., Sweeney, H. L., Houdusse, A. & Raunser, S. High-  
644 resolution structures of the actomyosin-V complex in three nucleotide  
645 states provide insights into the force generation mechanism. *eLife* **10**  
646 (2021). <https://doi.org/10.7554/eLife.73724>
- 647 16 Planelles-Herrero, V. J., Hartman, J. J., Robert-Paganin, J., Malik, F. I. &  
648 Houdusse, A. Mechanistic and structural basis for activation of cardiac  
649 myosin force production by omecamtiv mecarbil. *Nature Communications*  
650 **8**, 190 (2017). <https://doi.org/10.1038/s41467-017-00176-5>

- 651 17 Llinas, P. *et al.* How actin initiates the motor activity of Myosin.  
652 *Developmental cell* **33**, 401-412 (2015).
- 653 18 Yengo, C. M. & Sweeney, H. L. Functional Role of Loop 2 in Myosin V.  
654 *Biochemistry* **43**, 2605-2612 (2004). <https://doi.org/10.1021/bi035510v>
- 655 19 Forgacs, E. *et al.* Switch 1 mutation S217A converts myosin V into a low  
656 duty ratio motor. *Journal of Biological Chemistry* **284**, 2138-2149 (2009).
- 657 20 Klebl, D. P., White, H. D., Sobott, F. & Muench, S. P. On-grid and in-flow  
658 mixing for time-resolved cryo-EM. *Acta Crystallographica Section D* **77**,  
659 1233-1240 (2021). <https://doi.org/10.1107/S2059798321008810>
- 660 21 Kontziampasis, D. *et al.* A cryo-EM grid preparation device for time-  
661 resolved structural studies. *IUCrJ* **6** (2019).  
662 <https://doi.org/doi:10.1107/S2052252519011345>
- 663 22 Ecken, J. v. d., Heissler, S. M., Pathan-Chhatbar, S., Manstein, D. J. &  
664 Raunser, S. Cryo-EM structure of a human cytoplasmic actomyosin  
665 complex at near-atomic resolution. *Nature* **534**, 724-728 (2016).  
666 <https://doi.org/10.1038/nature18295>
- 667 23 Robert-Paganin, J. *et al.* The actomyosin interface contains an  
668 evolutionary conserved core and an ancillary interface involved in  
669 specificity. *Nature communications* **12**, 1-11 (2021).
- 670 24 Wulf, S. F. *et al.* Force-producing ADP state of myosin bound to actin.  
671 *Proceedings of the National Academy of Sciences* **113**, E1844-E1852  
672 (2016).
- 673 25 Croll, T. I. ISOLDE: a physically realistic environment for model building  
674 into low-resolution electron-density maps. *Acta Crystallographica Section*  
675 *D: Structural Biology* **74**, 519-530 (2018).
- 676 26 Cook, R. K., Blake, W. T. & Rubenstein, P. A. Removal of the amino-  
677 terminal acidic residues of yeast actin. Studies in vitro and in vivo. *J Biol*  
678 *Chem* **267**, 9430-9436 (1992).
- 679 27 Sutoh, K., Ando, M., Sutoh, K. & Toyoshima, Y. Y. Site-directed  
680 mutations of Dictyostelium actin: disruption of a negative charge cluster  
681 at the N terminus. *Proceedings of the National Academy of Sciences* **88**,  
682 7711-7714 (1991). <https://doi.org/doi:10.1073/pnas.88.17.7711>
- 683 28 Muretta, J. M., Rohde, J. A., Johnsrud, D. O., Cornea, S. & Thomas, D.  
684 D. Direct real-time detection of the structural and biochemical events in  
685 the myosin power stroke. *Proceedings of the National Academy of*  
686 *Sciences* **112**, 14272-14277 (2015).  
687 <https://doi.org/doi:10.1073/pnas.1514859112>
- 688 29 Rosenfeld, S. S. & Lee Sweeney, H. A Model of Myosin V Processivity\*.  
689 *Journal of Biological Chemistry* **279**, 40100 - 40111 (2004).
- 690 30 Burgess, S. *et al.* The prepower stroke conformation of myosin V. *The*  
691 *Journal of Cell Biology* **159**, 983-991 (2002).
- 692 31 Walker, M. L. *et al.* Two-headed binding of a processive myosin to F-  
693 actin. *Nature* **405**, 804-807 (2000).
- 694 32 Várkuti, B. H. *et al.* A novel actin binding site of myosin required for  
695 effective muscle contraction. *Nature Structural & Molecular Biology* **19**,  
696 299-306 (2012). <https://doi.org/10.1038/nsmb.2216>
- 697 33 Fineberg, A. *et al.* Myosin-5 varies its steps along the irregular F-actin  
698 track. *bioRxiv*, 2023.2007.2016.549178 (2023).  
699 <https://doi.org/10.1101/2023.07.16.549178>
- 700 34 Gravett, M. S. C. *et al.* Exploiting cryo-EM structures of actomyosin-5a to  
701 reveal the physical properties of its lever. *bioRxiv*,

- 702 2023.2003.2019.533260 (2023).  
703 <https://doi.org/10.1101/2023.03.19.533260>  
704 35 Spudich, J. A. & Watt, S. The regulation of rabbit skeletal muscle  
705 contraction I. Biochemical studies of the interaction of the tropomyosin-  
706 troponin complex with actin and the proteolytic fragments of myosin.  
707 *Journal of biological chemistry* **246**, 4866-4871 (1971).  
708 36 Klebl, D. P. *et al.* Sample deposition onto cryo-EM grids: from sprays to  
709 jets and back. *Acta Crystallographica Section D: Structural Biology* **76**  
710 (2020).  
711 37 Zivanov, J. *et al.* New tools for automated high-resolution cryo-EM  
712 structure determination in RELION-3. *Elife* **7**, e42166 (2018).  
713 38 Zheng, S. Q. *et al.* MotionCor2: anisotropic correction of beam-induced  
714 motion for improved cryo-electron microscopy. *Nature methods* **14**, 331  
715 (2017).  
716 39 Zhang, K. Gctf: Real-time CTF determination and correction. *Journal of*  
717 *structural biology* **193**, 1-12 (2016).  
718 40 He, S. & Scheres, S. H. Helical reconstruction in RELION. *Journal of*  
719 *structural biology* **198**, 163-176 (2017).  
720 41 Sanchez-Garcia, R. *et al.* DeepEMhancer: a deep learning solution for  
721 cryo-EM volume post-processing. *Communications Biology* **4**, 874  
722 (2021). <https://doi.org/10.1038/s42003-021-02399-1>  
723 42 Wagner, T. *et al.* SPHIRE-crYOLO is a fast and accurate fully automated  
724 particle picker for cryo-EM. *Communications Biology* **2**, 218 (2019).  
725 43 Punjani, A., Zhang, H. & Fleet, D. J. Non-uniform refinement: adaptive  
726 regularization improves single-particle cryo-EM reconstruction. *Nature*  
727 *methods* **17**, 1214-1221 (2020).  
728 44 Webb, B. & Sali, A. Comparative protein structure modeling using  
729 MODELLER. *Current protocols in bioinformatics* **54**, 5.6. 1-5.6. 37  
730 (2016).  
731 45 Pettersen, E. F. *et al.* UCSF Chimera—a visualization system for  
732 exploratory research and analysis. *Journal of computational chemistry*  
733 **25**, 1605-1612 (2004).  
734 46 Casañal, A., Lohkamp, B. & Emsley, P. Current developments in Coot for  
735 macromolecular model building of Electron Cryo-microscopy and  
736 Crystallographic Data. *Protein Science* **29**, 1055-1064 (2020).  
737 47 Afonine, P. V. *et al.* Real-space refinement in PHENIX for cryo-EM and  
738 crystallography. *Acta Crystallographica Section D: Structural Biology* **74**,  
739 531-544 (2018).  
740 48 Scarff, C. A. *et al.* Structure of the shutdown state of myosin-2. *Nature*  
741 **588**, 515-520 (2020). <https://doi.org/10.1038/s41586-020-2990-5>  
742  
743  
744



745 **Acknowledgements**

746 Prof. Howard White, and the late Prof. John Trinick, proposed this experiment  
747 some 40 years ago and it has taken until now, with the required improvements in  
748 technology, for it to be accomplished. We thank John for his foresight and the  
749 mentorship he provided to us. We thank members of the cryoEM community at  
750 Leeds for their help and guidance, particularly Glenn Carrington for his advice on  
751 movie generation. All EM data were collected at the Astbury Biostructure funded  
752 by the University of Leeds and the Wellcome Trust (108466/Z/15/Z; Grant No.  
753 204825/Z/16/Z to C.A.S), and we thank the support scientists for their help in data  
754 acquisition. This work was funded by a Biotechnology and Biological Sciences  
755 Research Council (BBSRC) grant to S.P.M. (BB/P026397/1), and supported by  
756 research grants to H.D.W. from the American Heart Association and to H.D.W.  
757 and V.G. from the US National Institutes of Health (NIHR21AR-071675). This  
758 work was also funded by the Medical Research Council (Grant No.  
759 MR/P018491/1). S.N.M is supported by a School of Molecular and Cellular  
760 Biology, University of Leeds, funded PhD studentship. C.A.S is supported by a  
761 BHF Jacqueline Murray Coomber Fellowship (FS/20/21/34704).

762

763 **Author contributions**

764 H.D.W. and S.P.M. designed the project. B.V. and E.F. produced the myosin  
765 mutant constructs. H.D.W., S.P.M., D.P.K. and F.S. aided in design of the time-  
766 resolved approach. D.P.K., S.P.M. and H.D.W. performed time-resolved cryoEM  
767 grid screening, optimisation and data collection. D.P.K., C.R. and V.G. performed  
768 initial data analysis and initial processing of the cryoEM data. E.F., J.A., H.D.W.  
769 and D.A.W. performed kinetic experiments and kinetic data analysis. M.S.  
770 performed kinetic modelling. S.N.M. and C.A.S. performed cryoEM data  
771 refinement and final model building. S.N.M. performed MD simulations. S.N.M.  
772 and C.A.S. performed structure validation. S.N.M., C.A.S., S.P.M., P.J.K., D.P.K.  
773 and H.D.W. interpreted the data and the model. S.N.M and C.A.S. performed  
774 main figure and movie generation. S.N.M., C.A.S., D.P.K., J.A., and S.P.M.  
775 produced supplementary figures. C.A.S., S.P.M., P.J.K, D.P.K., S.N.M, and  
776 H.D.W. wrote the manuscript. All authors discussed the results and commented  
777 on the manuscript.

778

779

780 **Competing Interests**

781 The authors declare no competing interests.

782

783 **Materials & Correspondence**

784 Correspondence and material requests should be addressed to S.P.M, C.A.S, &

785 H.D.W.

786 **Extended Data Table 1:** Data collection, processing, model building and  
 787 refinement statistics for time-resolved EM data, for three collections at 10 ms  
 788 (a,b,c) and 120 ms (e,f,g) respectively.

|                                             | 10 ms               | 120 ms              |                  |
|---------------------------------------------|---------------------|---------------------|------------------|
| <b>Data collection and processing</b>       |                     |                     |                  |
| Magnification                               | 130,000 x           | 130,000 x           |                  |
| Voltage (kV)                                | 300                 | 300                 |                  |
| Nominal defocus range ( $\mu\text{m}$ )     | -2 to -4.1          | -2 to -4.1          |                  |
| Pixel size ( $\text{\AA}$ )                 | 1.07                | 1.07                |                  |
| Total fluence ( $\text{e}^-/\text{\AA}^2$ ) | 67.58 <sup>a</sup>  | 55.4 <sup>e</sup>   |                  |
|                                             | 55.4 <sup>b</sup>   | 56.5 <sup>f</sup>   |                  |
|                                             | 61.2 <sup>c</sup>   | 56.5 <sup>g</sup>   |                  |
| Number of fractions                         | 32                  | 32                  |                  |
| Exposure time (s)                           | 7                   | 7                   |                  |
| Number of micrographs                       | 3878 <sup>a</sup>   | 1020 <sup>e</sup>   |                  |
|                                             | 3339 <sup>b</sup>   | 2602 <sup>f</sup>   |                  |
|                                             | 2475 <sup>c</sup>   | 1354 <sup>g</sup>   |                  |
| Initial number of segments                  | 218602 <sup>a</sup> | 122312 <sup>e</sup> |                  |
|                                             | 285704 <sup>b</sup> | 198508 <sup>f</sup> |                  |
|                                             | 211425 <sup>c</sup> | 111047 <sup>g</sup> |                  |
|                                             | <b>primed</b>       | <b>postPS</b>       | <b>F-actin</b>   |
| Final number of segments                    | 93374               | 94093               | 674122           |
| Resolution (FSC = 0.143)                    | 4.4 $\text{\AA}$    | 4.2 $\text{\AA}$    | 3.7 $\text{\AA}$ |

789

790 **Extended Data Table 2:** Data collection, processing, model building and  
791 refinement statistics for time-resolved EM data.

|                                           | <b>Primed<br/>actomyosin</b>             | <b>PostPS<br/>actomyosin</b>             |
|-------------------------------------------|------------------------------------------|------------------------------------------|
| <b>Model Refinement</b>                   |                                          |                                          |
| Initial Model used                        | PDB 4ZG4<br>(myosin)<br>PDB 5ONV (actin) | PDB 1W7I<br>(myosin)<br>PDB 5ONV (actin) |
| Map-model correlation (FSC =<br>0.143)    | 4.4 Å                                    | 4.2 Å                                    |
| Map-sharpening B-factor (Å <sup>2</sup> ) |                                          |                                          |
| RELION post-processing                    | -119                                     | -84                                      |
| <b>Model composition</b>                  |                                          |                                          |
| Non-hydrogen atoms                        | 14852                                    | 14790                                    |
| Protein residues                          | 1857                                     | 1848                                     |
| Ligands                                   | 4                                        | 4                                        |
| <b>R.M.S.Z deviations</b>                 |                                          |                                          |
| Bond lengths (Å)                          | 0.61                                     | 0.6                                      |
| Bond angles (°)                           | 0.75                                     | 0.77                                     |
| <b>Validation</b>                         |                                          |                                          |
| MolProbity score                          | 2.06                                     | 1.75                                     |
| Clashscore                                | 17.12                                    | 9.73                                     |
| Poor rotamers (%)                         | 0.25                                     | 0.19                                     |
| <b>Ramachandran plot</b>                  |                                          |                                          |
| Favoured (%)                              | 95.34                                    | 96.41                                    |
| Allowed (%)                               | 4.34                                     | 3.54                                     |
| Disallowed (%)                            | 0.32                                     | 0.05                                     |

792

793 **Extended Data Table 3:** Processing, model building and refinement statistics for  
794 unbound primed myosin-5 from 120 ms time-resolved EM data

| <b>Free myosin-5</b>                      |                   |
|-------------------------------------------|-------------------|
| <b>Data processing</b>                    |                   |
| Initial number of particles               | 729596            |
| Final number of particles                 | 23930             |
| Resolution (FSC = 0.143)                  | 4.9 Å             |
| <b>Model Refinement</b>                   |                   |
| Initial Model used                        | PDB 4ZG4 (myosin) |
| Map-model correlation (FSC = 0.5)         | 5.1 Å             |
| Map-sharpening B-factor (Å <sup>2</sup> ) | -233              |
| <b>Model composition</b>                  |                   |
| Non-hydrogen atoms                        | 6008              |
| Protein residues                          | 737               |
| <b>R.M.S.Z deviations</b>                 |                   |
| Bond lengths (Å)                          | 0.66              |
| Bond angles (°)                           | 1.04              |
| <b>Validation</b>                         |                   |
| MolProbity score                          | 1.70              |
| Clashscore                                | 10.03             |
| Poor rotamers (%)                         | 0.62              |
| <b>Ramachandran plot</b>                  |                   |
| Favoured (%)                              | 97.00             |
| Allowed (%)                               | 2.73              |
| Disallowed (%)                            | 0.27              |

795

1 **Supporting Information - Swinging lever mechanism of myosin directly**  
2 **demonstrated by time-resolved cryoEM**

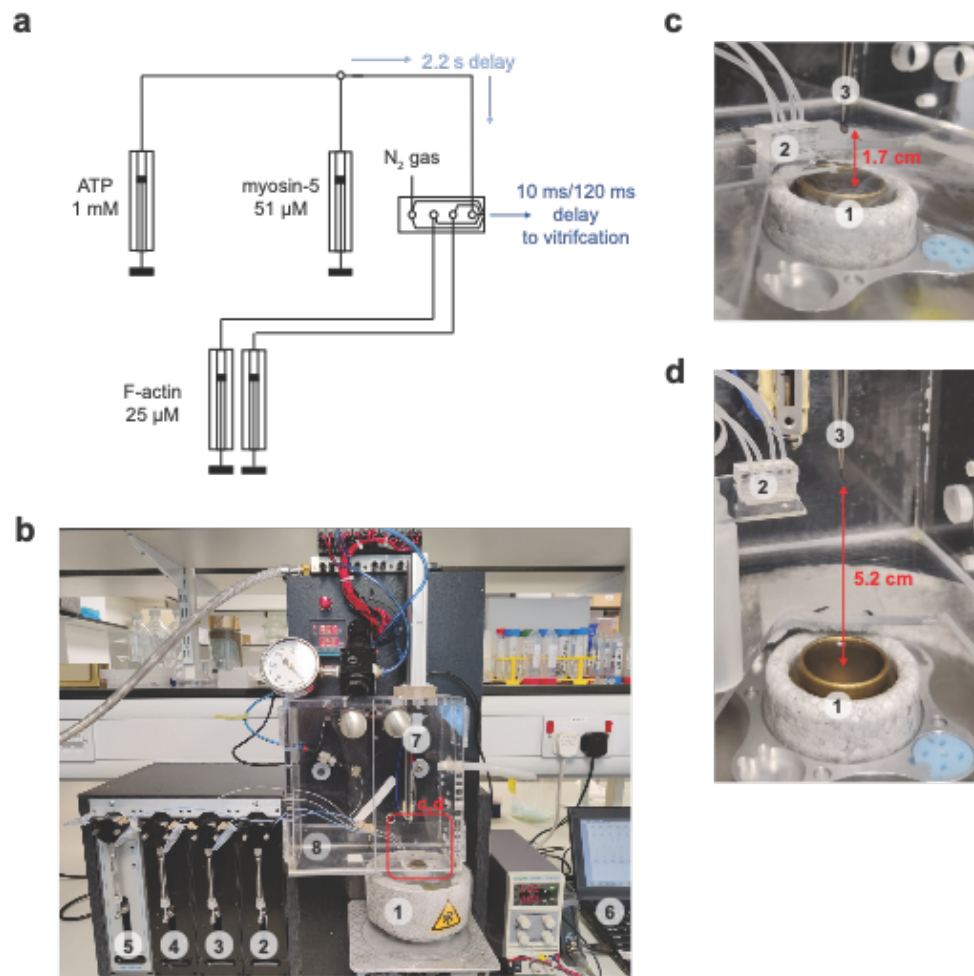

3  
4  
5 **Extended Data Fig. 1. Experimental setup for time-resolved cryoEM.** (a) Schematic  
6 of experimental setup showing the concentrations of reagents used. (b) Photo of the  
7 experimental setup with liquid nitrogen/ethane container (1), syringe pumps (2-5), control  
8 PC (6), forceps on plunger (7) and humidity controlled chamber (8). The red box  
9 highlights the region around the spray nozzle, magnified views of this region are shown  
10 in c-d. (c) Magnified view of ethane cup (1), spray nozzle (2) and grid in sample  
11 application position (3) with a short distance for the 10 ms timepoint. (d) Similar to c,  
12 except for the larger distance between nozzle and ethane which was used for the 120  
13 ms timepoint.

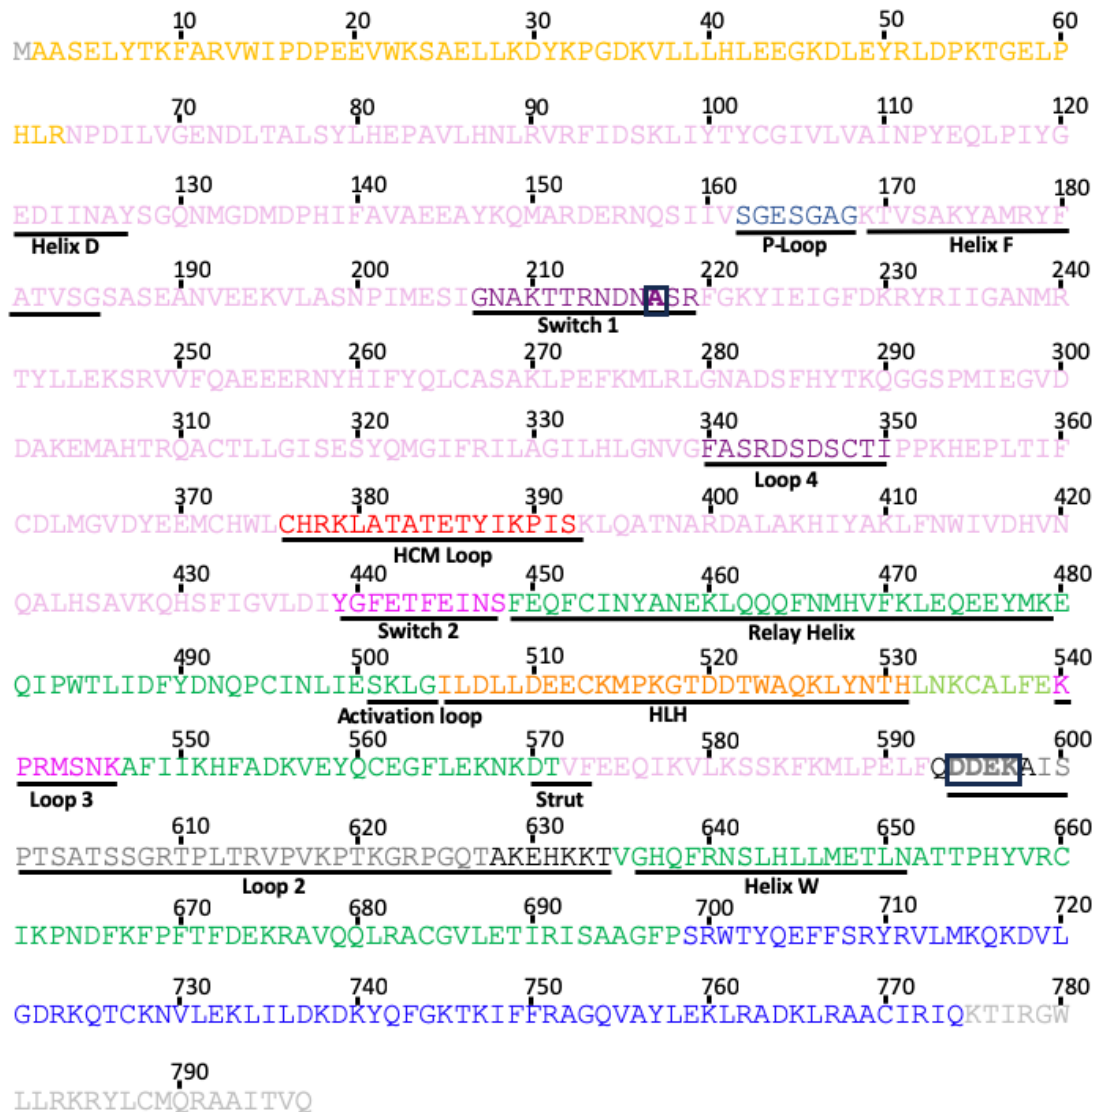

14  
15  
16  
17  
18  
19  
20  
21  
22  
23  
24

**Extended Data Fig. 2. Myosin S1 sequence and domain architecture.** Myosin-5 S1 amino acid sequence (myosin heavy chain residues 1-797). Subdomains and regions of interest are colored as in Fig.1-4 and underlined. Gold, N-terminal domain; pink, U50; navy blue, P-loop; purple, switch-1 and loop4; red, HCM loop; magenta, switch-2 and loop3; green, L50; orange, HLH; black/grey, loop2, where residues in black are modelled in our structure and those in grey are not; royal blue, converter (residues 699-750) and modelled region of light chain binding domain; light grey residues 775-797 are the unmodeled region of the light chain binding domain of the construct. The switch 1 S<sup>217</sup>A mutation and loop 2 DDEK<sup>594-597</sup> deletion are boxed. The construct studied has a FLAG-TAG sequence, DYKDDDDK, C-terminal to the myosin heavy chain sequence stated.

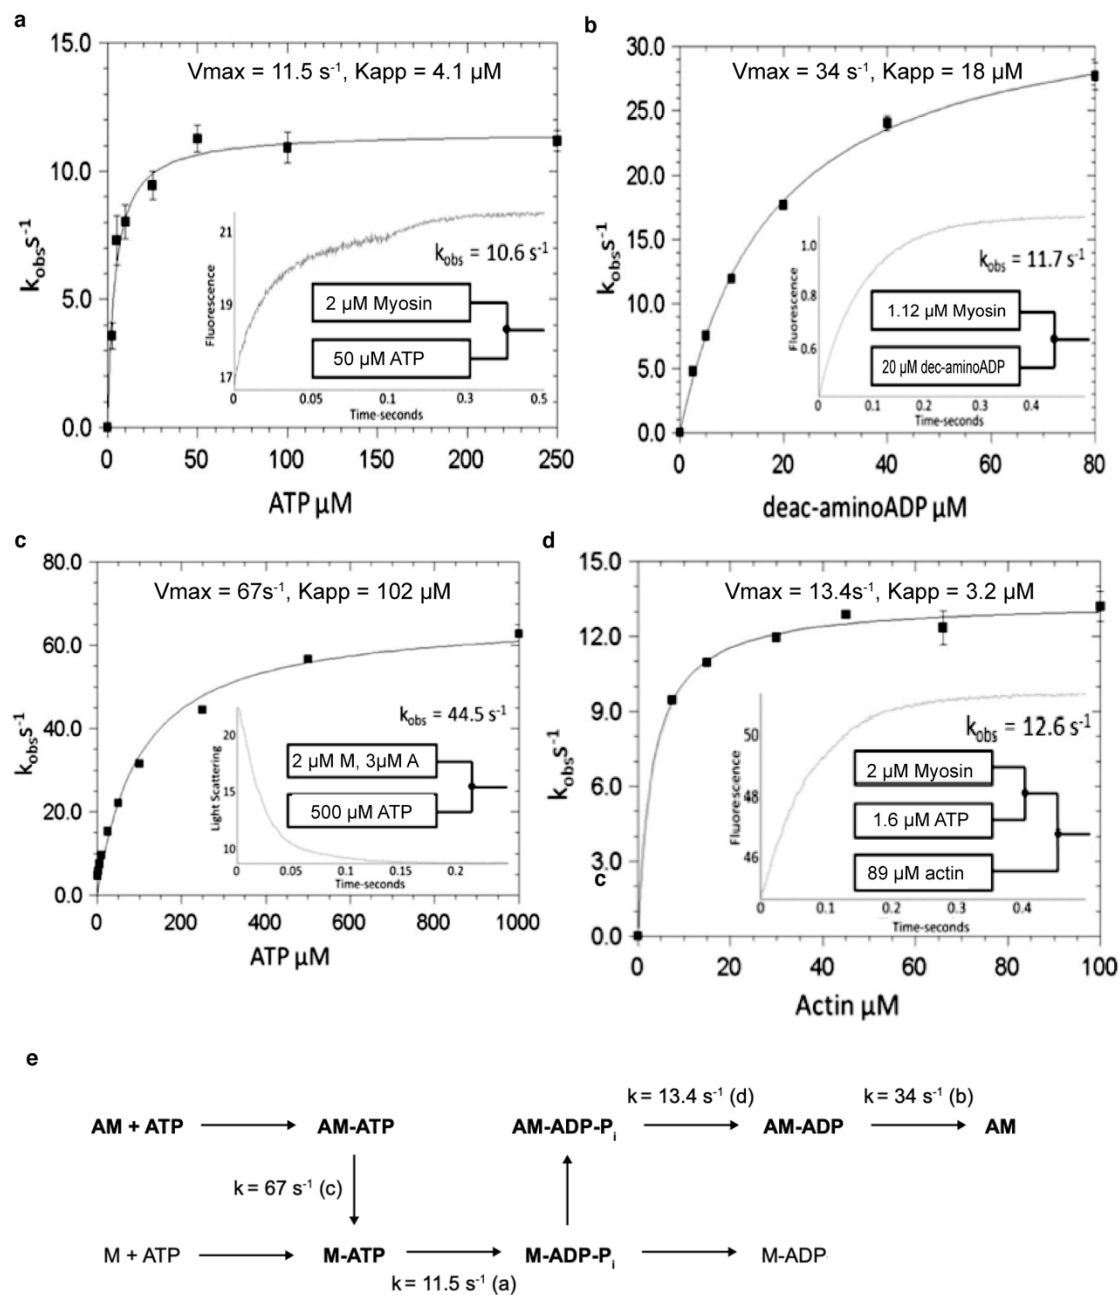

25  
26

27 **Extended Data Fig. 3. Transient kinetics of mutant actomyosin-5 ATP hydrolysis.**

28 ATP hydrolysis measured at 20 °C by single mixing (a-c) or double mixing (d) stopped-  
 29 flow. Final concentrations in the cell: 37.5 mM KAc, 25 mM KCl, 10 mM MOPS (pH 7.0),  
 30 2.25 mM MgCl<sub>2</sub>, 0.1 mM EGTA, 0.25 mM DTT. Representative traces shown in insets  
 31 with a stopped-flow mixing schematic. **(a)** Myosin ATP hydrolysis measured by intrinsic  
 32 tryptophan fluorescence using a 320-380 nm bandpass filter with excitation at 295 nm.  
 33 Final concentrations: 1.0  $\mu\text{M}$  myosin, 1.5  $\mu\text{M}$  calmodulin, and 2.5 - 250  $\mu\text{M}$  ATP. The  
 34 hyperbolic fit yields  $V_{max} = 11.5 \text{ s}^{-1}$ ,  $K_{app} = 4.1 \text{ }\mu\text{M}$ . **(b)** ADP dissociation from actomyosin-  
 35 ADP was measured using a deac-aminoADP chase with a 455 nm long-pass filter and  
 36 excitation at 430 nm. Final concentrations: 0.14  $\mu\text{M}$  or 0.56  $\mu\text{M}$  myosin and calmodulin,  
 37 1.42  $\mu\text{M}$  actin, 5.7  $\mu\text{M}$  ADP, and 2.5 - 80  $\mu\text{M}$  deac-aminoADP. The hyperbolic fit yields  
 38  $V_{max} = 34 \text{ s}^{-1}$ ,  $K_{app} = 18 \text{ }\mu\text{M}$ . **(c)** ATP-induced dissociation of myosin from actin measured  
 39 by light scattering with a 400 nm long-pass filter and illumination at 432 nm. Final  
 40 concentrations: 1  $\mu\text{M}$  myosin, 1  $\mu\text{M}$  calmodulin, 1.5  $\mu\text{M}$  actin, and 1 - 1000  $\mu\text{M}$  ATP. The  
 41 hyperbolic fit yields  $V_{max} = 67 \text{ s}^{-1}$ ,  $K_{app} = 102 \text{ }\mu\text{M}$ . **(d)** Phosphate dissociation from the  
 42 actomyosin-ADP-P<sub>i</sub> complex, measured by MDCC-PBP with a 455 nm long-pass filter  
 43 and excitation at 434 nm. 2  $\mu\text{M}$  myosin mixed with 1.6  $\mu\text{M}$  ATP, held in a delay line for



44 2 s, and then mixed with actin to accelerate  $P_i$  release. Final concentrations: 0.5  $\mu\text{M}$   
45 myosin, 0.5  $\mu\text{M}$  calmodulin, 0.4  $\mu\text{M}$  ATP, 0 - 100  $\mu\text{M}$  actin, 5  $\mu\text{M}$  MDCC-PBP, 0.1 mM 7-  
46 methylguanosine, and 0.01 unit/mL purine nucleoside phosphorylase. The hyperbolic fit  
47 yields  $V_{\max} = 13.4 \text{ s}^{-1}$ ,  $K_{\text{app}} = 3.2 \mu\text{M}$ . **(e)** Kinetic mechanism of mutant actomyosin-5 S1  
48 ATP hydrolysis. Abbreviation: A, actin, M, Myosin-5 S1(1IQ, S217A,  $\Delta\text{DDEK}^{594-597}$ ),  $P_i$ ,  
49 phosphate. The main actomyosin ATPase pathway is in bold. Parentheses indicate from  
50 which experiment the rate and equilibrium constants were obtained.

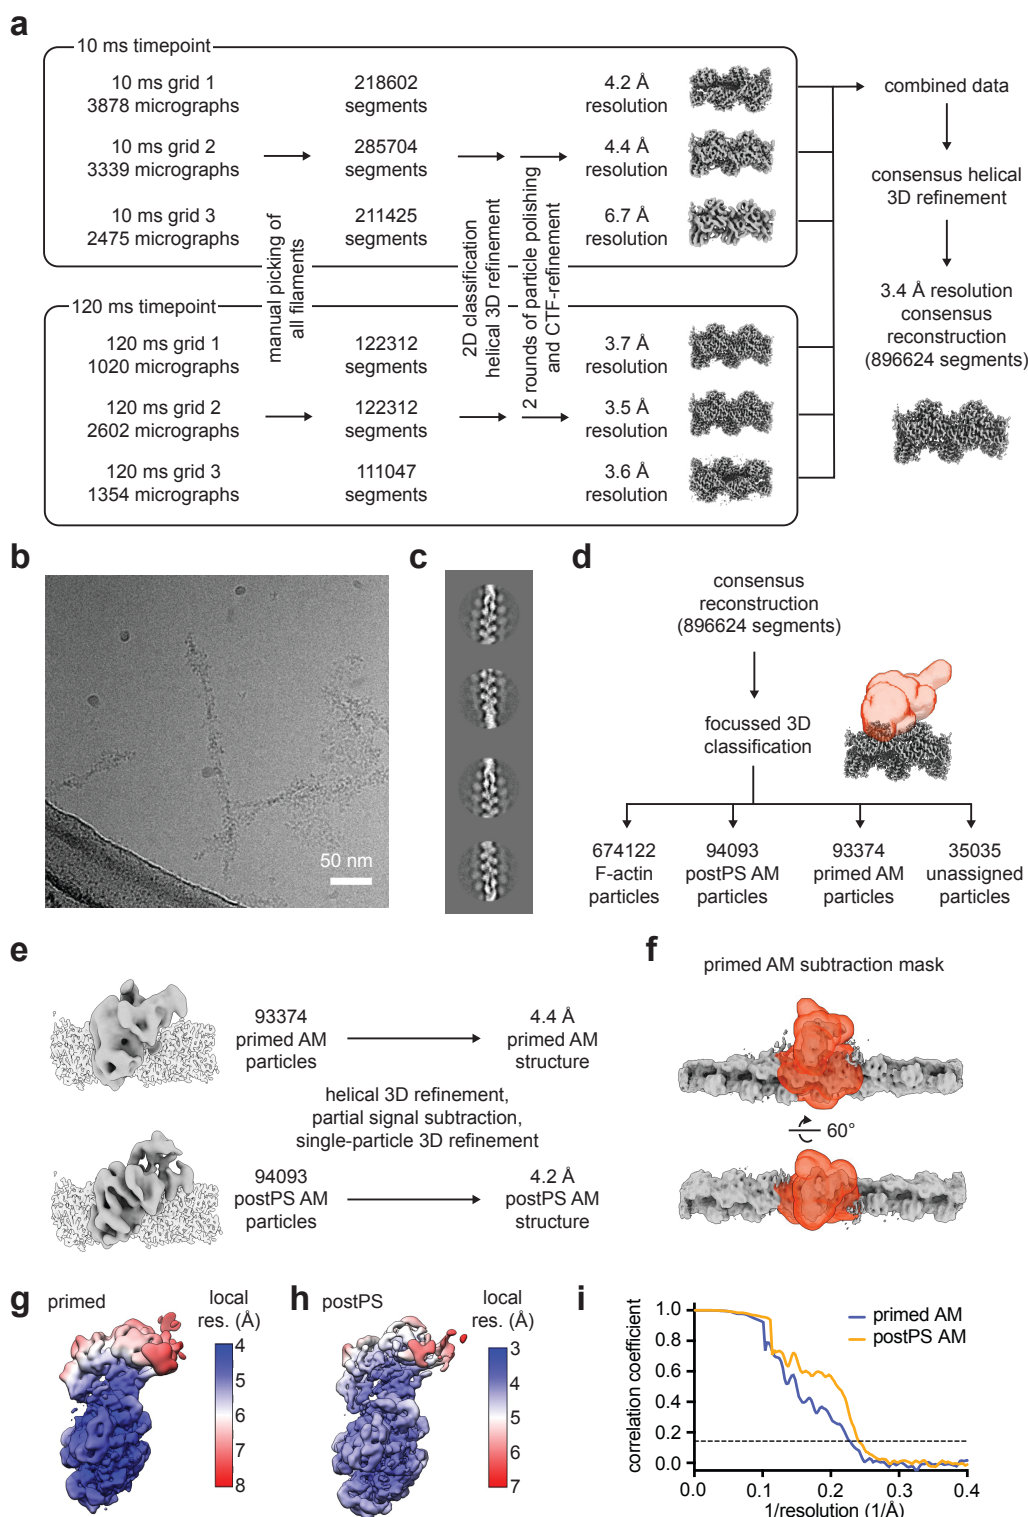

51  
52  
53  
54  
55  
56  
57  
58  
59  
60  
61  
62

**Extended Data Fig.4. Processing of time-resolved cryoEM data.** (a) Flow diagram of the initial image processing of the 10 ms and 120 ms data sets. (b) Micrograph from the 10 ms dataset. (c) 2D classes from the 10 ms timepoint, bound myosin appears as a diffuse density along the actin filament. (d) Result of the focused 3D classification of the combined dataset with a mask covering the myosin binding site (AM: actomyosin). (e) Processing of primed or postPS actomyosin after focused classification. (f) Subtraction mask used for primed actomyosin processing. (g) Final primed actomyosin reconstruction showing local resolution in Å (h) final post PS actomyosin reconstruction showing local resolution in Å (i) Fourier shell correlation curves for prePS (blue) and postPS (yellow) with the 0.143 threshold indicated by a dotted line.

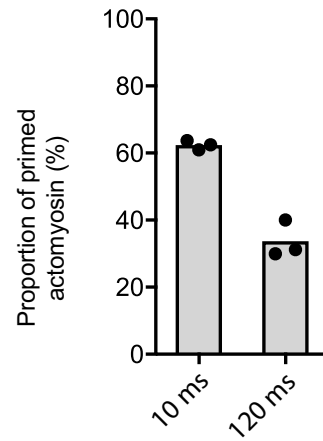

63

64 **Extended Data Fig.5. Proportion of primed and postPS states between timepoints**  
65 **and experimental repeats.** Proportion of the primed state at 10 ms or 120 ms. Shown  
66 is the mean as grey bars and replicates as black points.

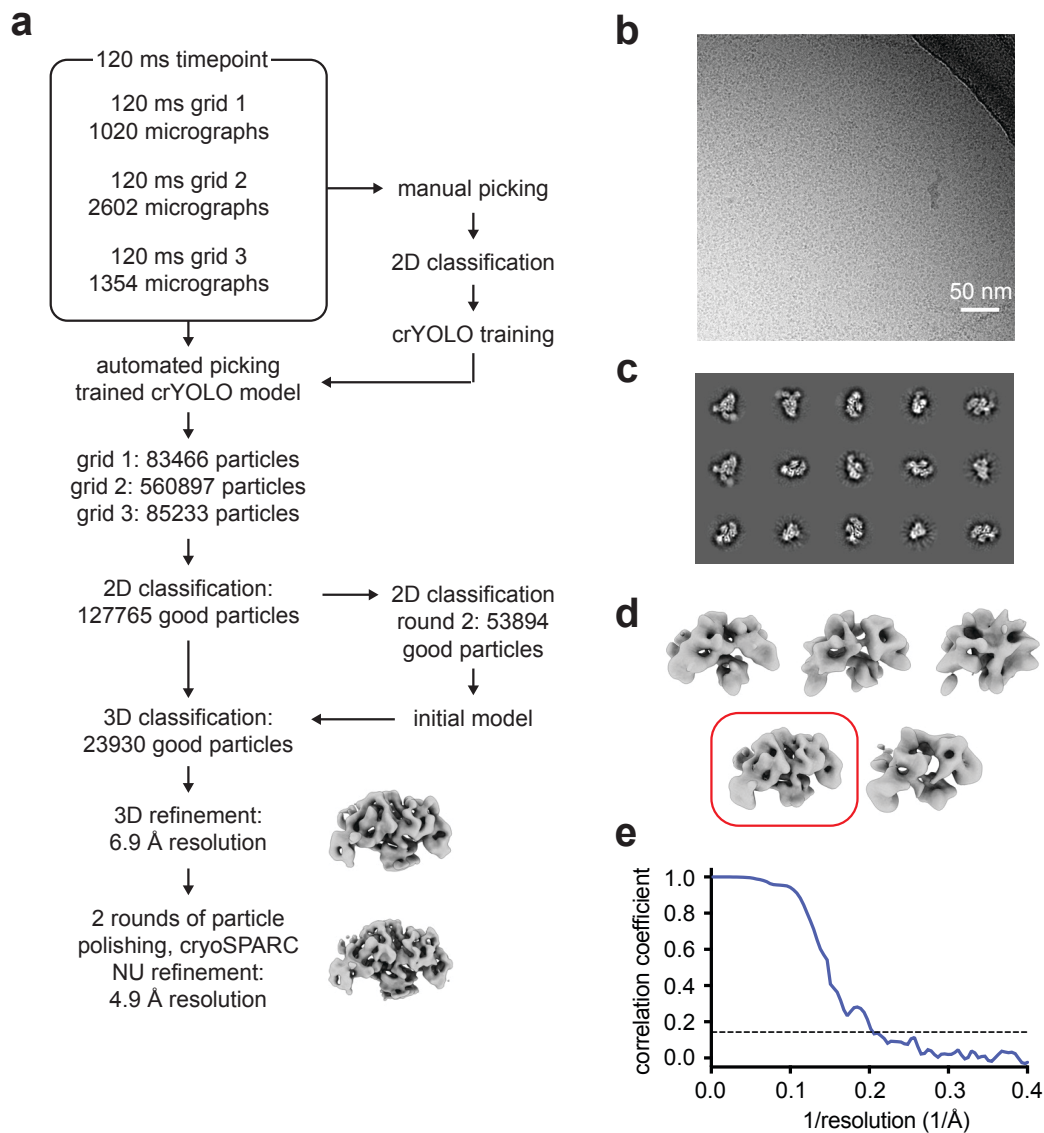

67

68 **Extended Data Fig.6. Unbound myosin-5 image processing.** (a) Processing pipeline  
69 for unbound myosin molecules. (b) Micrograph from the 120 ms time-resolved cryoEM  
70 data with a large number of unbound myosin-5 molecules. (c) Representative 2D  
71 classes. (d) 3D classification with the selected class highlighted by a red box. (e) Fourier  
72 shell correlation curve (blue) with the 0.143 threshold indicated by a dotted line.

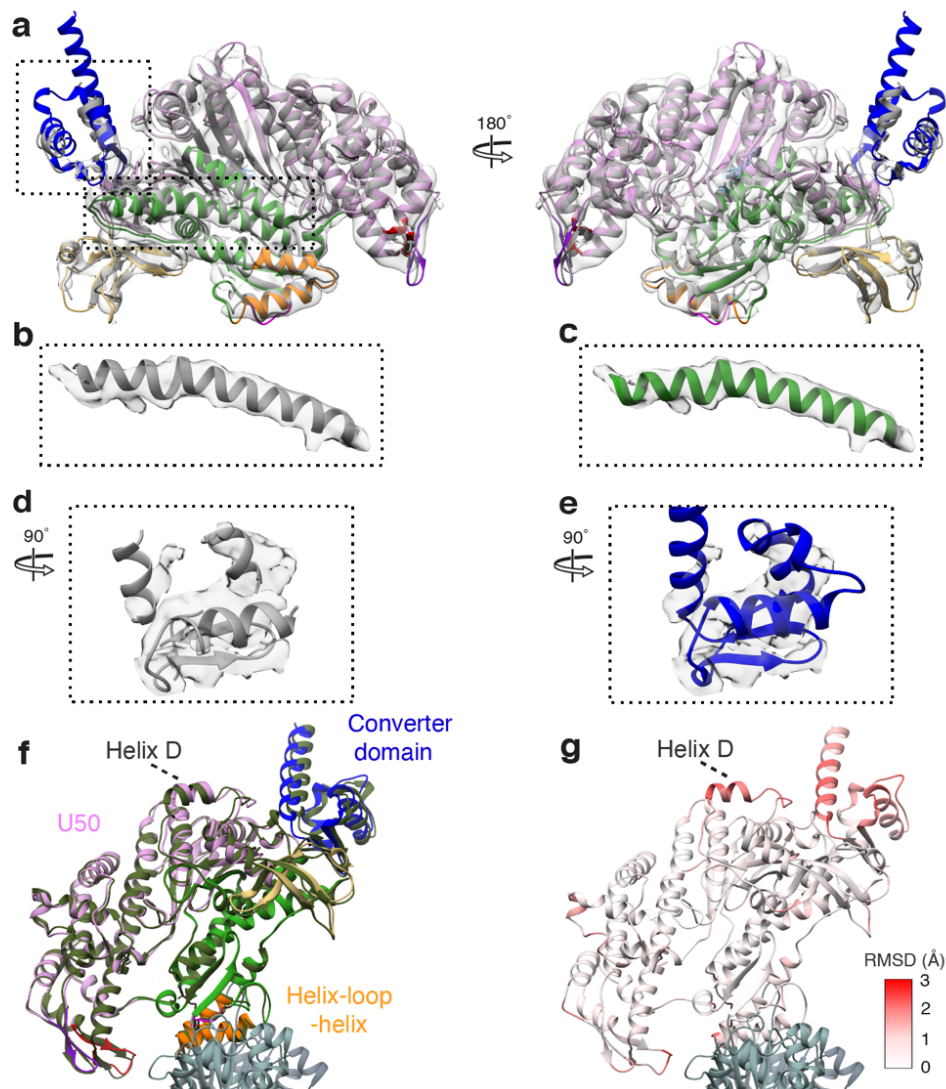

74 **Extended Data Fig.7. Atomic model of myosin-5a in the primed state.** (a) The EM  
75 density map of unbound myosin-5 with the crystal structure (PDB ID 4zg4) fitted directly  
76 (grey) and after flexible fitting (with subdomains colored, U50 pink, L50 green, N-term  
77 gold, converter blue, HLH orange). (b) Relay helix from PDB ID 4zg4 fitted into EM  
78 density map for unbound myosin-5 directly and (c) after flexible fitting. (d) Converter  
79 domain of PDB ID 4zg4 fitted into EM density map for unbound myosin-5 directly and (e)  
80 after flexible fitting. (f) Global superposition of the primed actomyosin-5 (colored as in  
81 Fig. 1) and unbound primed myosin-5 (colored olive green) shows a similar structure with  
82 no significant changes in domain architecture. (g) RMSD of myosin residues between  
83 primed actomyosin and primed myosin.

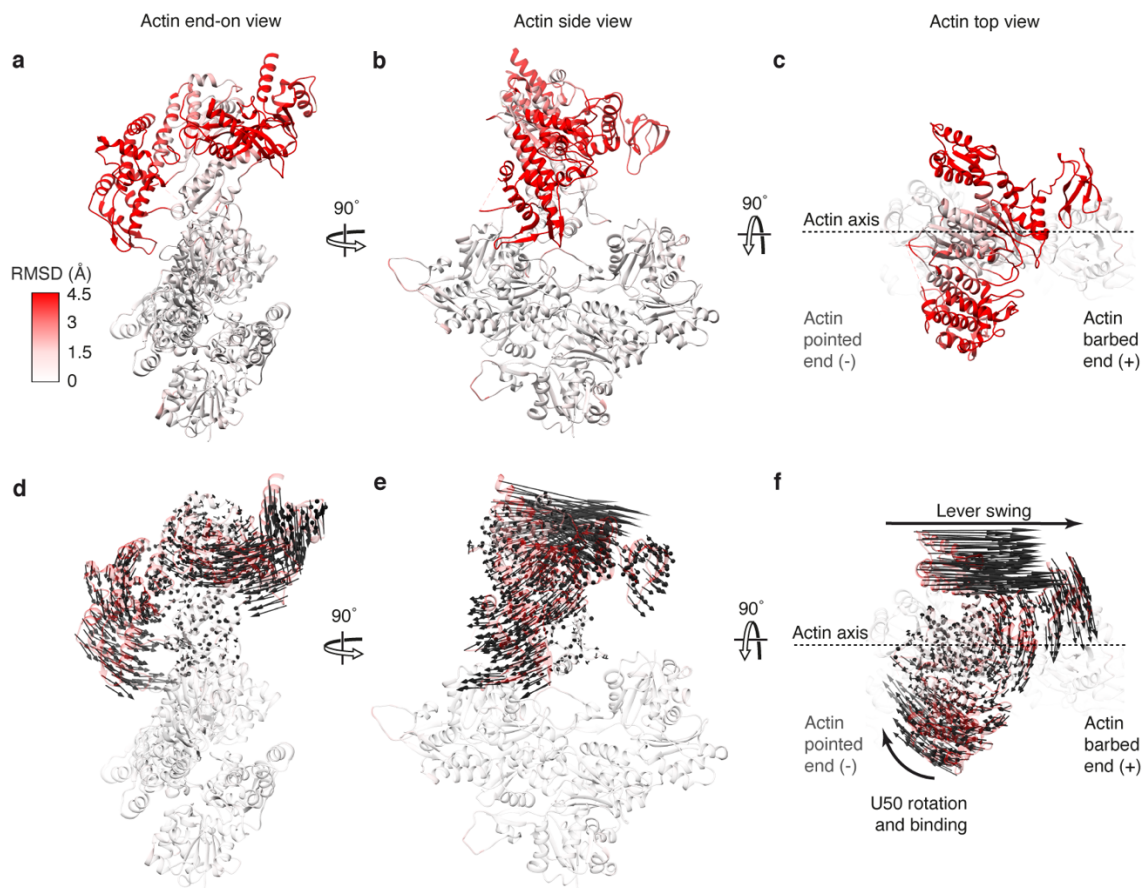

84

85 **Extended Data Fig.8. RMSD between primed and PostPS actomyosin structures.**  
86 Primed actomyosin PDB coloured by RMSD between primed and postPS actomyosin  
87 shown in (a) end-on view of F-actin, looking towards the pointed end, (b) view parallel to  
88 the actin axis and in (c) top view looking down over the motor domain. (d-f) are the same  
89 views as a-c respectively, but with vector arrows (in black) showing displacement in  
90 relative C $\alpha$  positions between primed and postPS actomyosin motor domains.

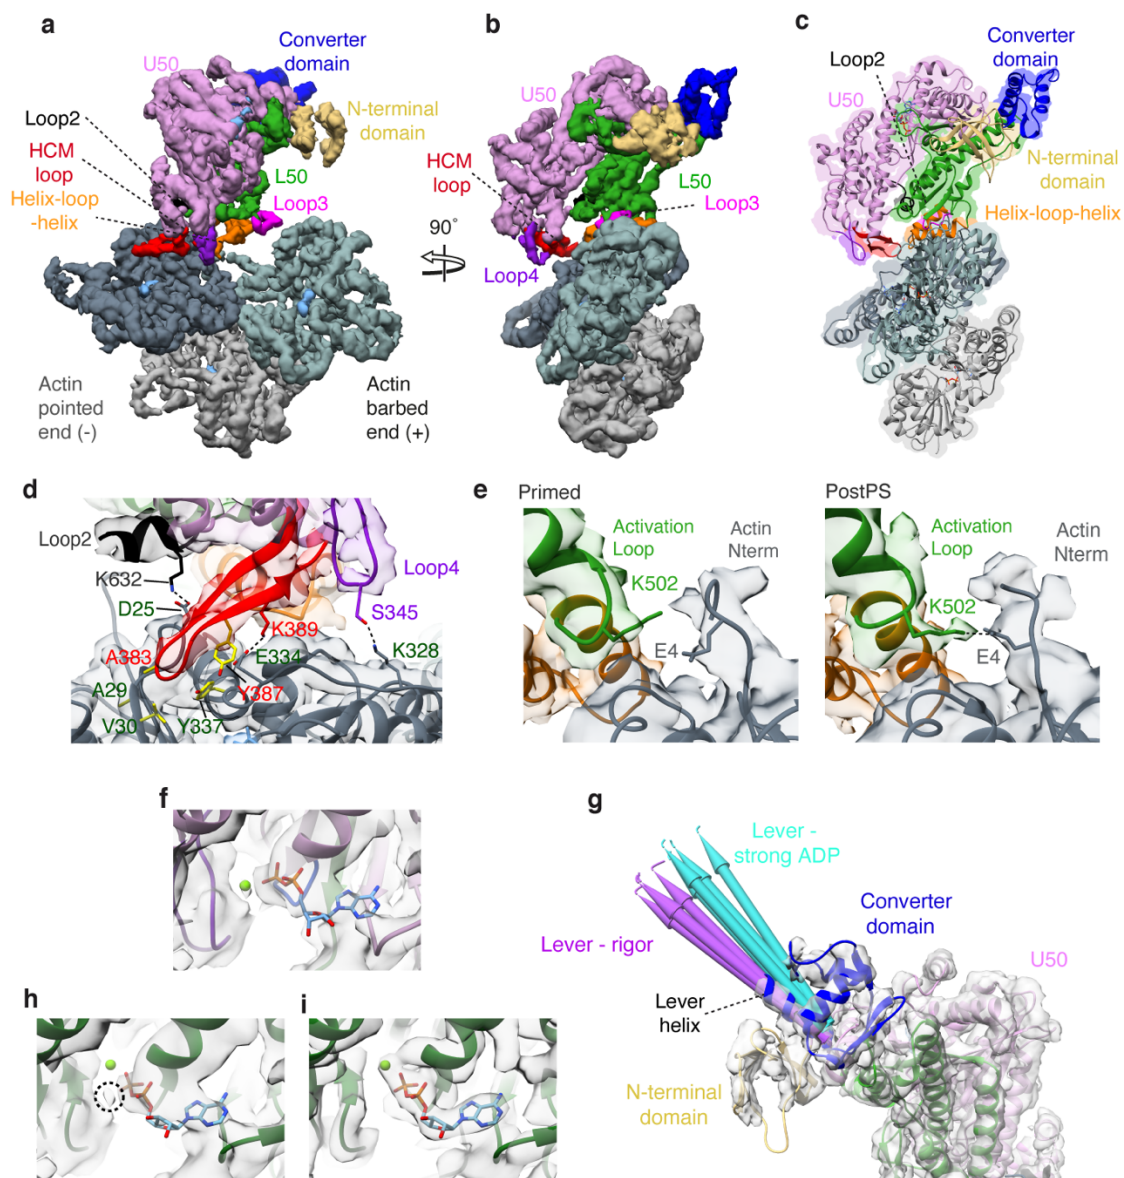

91

92 **Extended Data Fig.9. PostPS Actomyosin Structure.** CryoEM density map of the  
 93 postPS actomyosin-5 complex, segmented and colored by myosin subdomains and actin  
 94 chains as indicated (with central three actin subunits displayed). Map thresholded to  
 95 show secondary structure (threshold 0.15). Shown in (a) parallel to the actin axis and in  
 96 (b) in end-on view of F-actin, looking toward the pointed end. (c) Backbone depiction of  
 97 atomic model of postPS actomyosin-5, fitted into the EM density map, with view as in  
 98 (b). Actin subunits are shown in slate grey (-end), blue-grey (+end), and light grey. (d)  
 99 Magnified view of the U50, Loop2, HCM loop and loop4 contacts to actin. Relevant  
 100 interacting residues are labelled and shown with hydrophobic residues in yellow. (e)  
 101 Magnified view of the primed actomyosin state and post actomyosin state activation loop-  
 102 actin N-terminal interaction interface showing formation of hydrogen bond between K502  
 103 and E4 in the postPS structure. (f) PostPS nucleotide pocket fit to EM density (map  
 104 threshold 0.0096), (g) PostPS structure, focused on converter domain. The lever position  
 105 is more consistent with that observed in previous actomyosin-5 rigor structures (purple  
 106 pipes, PDB IDs: 7PLT, 7PLU, 7PLV, 7PLW, 7PLZ) than actomyosin-5 strong-ADP  
 107 structures (turquoise pipes, PDB IDs: 7PM5, 7PM6, 7PM7, 7PM8, 7PM9) (h) Nucleotide  
 108 pocket of actomyosin structure 7MP5 fitted to our PostPS EM density highlighting unfilled  
 109 magnesium density with a dashed circle. (i) Nucleotide pocket of actomyosin structure  
 110 7MP5 fitted to corresponding density EMDB ID: 13521 (map threshold 0.0197).  
 111 *DeepEMhancer* post-processed map depicted in (a-d, g), and *\*RELION* post-  
 112 processed map in (e,f,h,i).

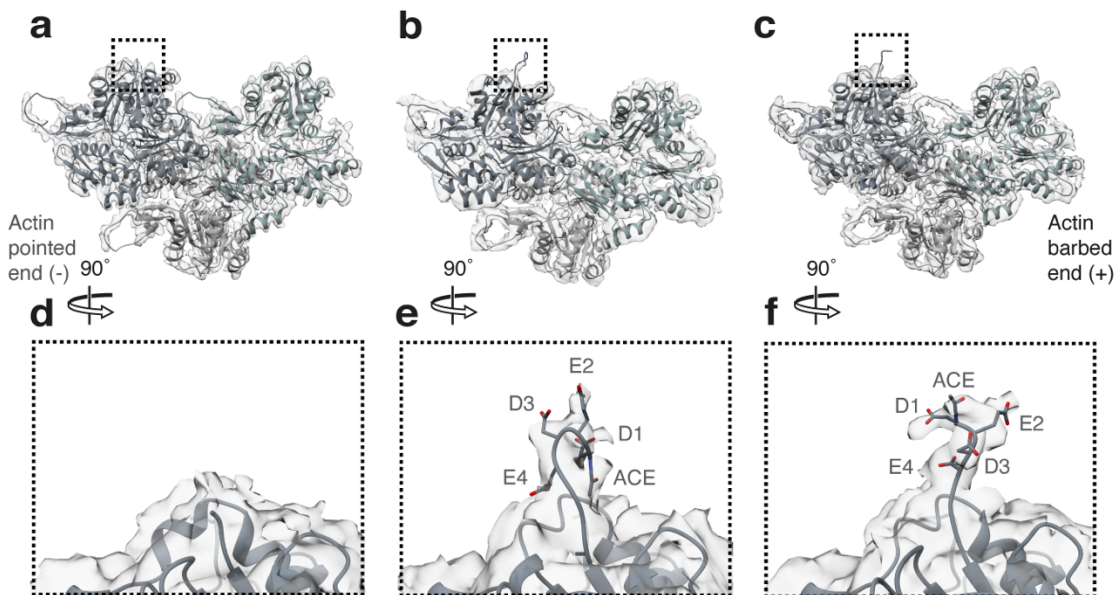

113

114

115 **Extended Data Fig.10. Actin Structure.** Actin structure is preserved between (a) actin

116 alone, (b) primed actomyosin, and (c) postPS actomyosin, except at the N-terminus

117 where it becomes ordered when myosin binds. D-loop density also becomes more

118 ordered when associated with myosin. The density observed for the N-terminal four

119 residues of actin is absent in (d) vacant actin and different between (e) primed

actomyosin, and (f) postPS actomyosin. ACE = acetyl group of D1.



120 **Supplementary Video 1. Structure of the primed actomyosin-5 complex.** (Time:  
121 0:00) Transparent cryoEM split map density of the primed actomyosin-5 complex  
122 (threshold myosin 0.085, actin 0.2) with backbone depiction of atomic model fitted,  
123 rotated 360°. Magnified view of the actomyosin interface fitted to cryoEM map, contacts  
124 are made by (0:37) the myosin HLH motif (threshold 0.008), (1:00) loop2 (threshold  
125 0.008), (1:22) actin N-terminus (threshold 0.0065) and (1:52) Loop3 (threshold 0.008).

126  
127 **Supplementary Video 2. Comparison of myosin structure in the primed**  
128 **actomyosin complex with unbound primed myosin.** (Time: 0:00) CryoEM density  
129 map of unbound primed myosin-5 with backbone depiction of atomic model fitted, rotated  
130 360°. (0:32) Depiction of unbound myosin-5 binding F-actin shown looking down the actin  
131 axis towards the pointed end. (0:3 s9) Morph from unbound primed myosin-5 to primed  
132 actomyosin-5 (aligned on the HLH motif, residues 505-530), highlighting U50 movement  
133 and super kinking of the relay helix. (0:50) Reversal of morph. (1:00) Magnified view of  
134 the U50 actin binding interface morphing from primed unbound myosin-5 to primed  
135 actomyosin-5 highlighting the HCM loop and Loop4's movement away from the F-actin  
136 surface. (1:14) Reversal of morph. (1:33) Magnified view of the nucleotide pocket again  
137 morphing from primed unbound myosin-5 to primed actomyosin-5, showing movement  
138 of the nucleotide. (1:43) Reversal of morph.

139  
140 **Supplementary Video 3. Structural changes during the power stroke.** (Time: 0:00)  
141 Primed actomyosin cryoEM split map (threshold 0.085) with backbone depiction of  
142 atomic model fitted, shown parallel to the actin axis. Morph from Primed actomyosin-5 to  
143 postPS actomyosin-5 fitted to relevant cryoEM split maps (threshold primed 0.085 and  
144 postPS 0.08) shown (0:13) parallel to the actin axis, (0:42) looking down the actin axis  
145 towards the barbed end, (1:09) parallel to the actin axis proximal to the converter, (1:37)  
146 looking down the actin axis towards the pointed end and finally (2:13) a top view looking  
147 down over the motor domain. (2:46) Magnified view of the actin N-term morphing from  
148 primed actomyosin-5 to postPS actomyosin-5 fitted to relevant cryoEM maps (threshold  
149 primed 0.0065 postPS 0.0065). (3:34) Magnified view of the U50 actin binding interface  
150 morphing from primed actomyosin-5 to postPS actomyosin-5 fitted to relevant cryoEM  
151 maps (threshold postPS 0.01). (4:12) Magnified view of the nucleotide pocket morphing  
152 from primed actomyosin-5 to postPS actomyosin-5 highlighting the state of the back  
153 door.

154 **Supplementary Video 4. Model of myosin force generation and ATPase activation**  
155 **on F-actin.** Note, here we separated out the motions of cleft closure and powerstroke  
156 into a suggested time sequence to produce a model of force generation. To achieve this,  
157 a chimeric model of primed and postPS actomyosin was generated (myosin chain  
158 numbering: aa1-128 primed, aa129-449 postPS, aa450-507 primed, aa508-632 post,  
159 aa633-763 primed). (Time: 0:00) Parallel view of free actin, followed by (0:09) primed  
160 myosin initially binding weakly through electrostatic interactions of loop2 with actin  
161 subdomain-1. (0:13) This brings the L50 of myosin in close proximity to the actin surface,  
162 enabling formation of the stereospecific primed actomyosin state. (0:19) HLH binding  
163 enables the actin N-terminal residues 1-4 to interact with HelixW and loop2, resulting in  
164 the U50 being cocked back towards the converter domain, which is a rotation around the  
165 F-actin axis. (0:25) Rearrangement of N-terminal actin interactions with HelixW and  
166 loop2 result in loop2 stabilisation at its C-terminal end, which promotes cleft closure.  
167 (0:30) Cleft closure results in the strong binding interface needed for a productive  
168 powerstroke. (0:36) Reversal of actin induced motor conformational changes to unbound  
169 primed myosin and rotation of view looking down the pointed end of the actin axis. (0:45)  
170 Repetition of U50 cocking back, (0:50) actin N-terminal stabilisation resulting in cleft  
171 closure and (0:55) productive powerstroke. (1:02) Once again reversal of actin induced  
172 motor conformational changes to unbound primed myosin and rotation of view looking  
173 down the barbed end of the actin axis. (1:14) Repetition of U50 cocking back highlighting  
174 the closed state of the back door and ADP movement. (1:20) Actin N-terminal  
175 stabilisation resulting in cleft closure, (1:24) opening the back door allowing Pi release  
176 and (1:29) a productive powerstroke.
